# Supplementary material for: Environmental flow envelopes: quantifying global, ecosystem–threatening streamflow alterations
Source: Copernicus journal article supplement (doi:10.5194/hess-2021-260), 2021-05-11
Supplement: Supplementary file 1 [file hess-2021-260-supplement-version3.zip]

Archive with 5 entries (5 files):
- fig3_a_to_c_data.csv
- fig3_d_to_f_data.csv
- hess-2021-260-supplement-version3.zip
- hess_2021_260_Virkki_et_al_supplementary_figures.pdf
- hybas_lev05.gpkg
