# Supplementary material for: Environmental flow envelopes: quantifying global, ecosystem–threatening streamflow alterations
Source: Copernicus journal article supplement (doi:10.5194/hess-2021-260), 2021-05-11
Supplement: Supplementary file 1 [file hess-2021-260-supplement-version3.zip › fig3_a_to_c_data.csv]

basin_id	season	frequency	severity
1	11101	high	0.129310344827586	-59.6622225783333
2	11101	intermediate	0.304761904761905	-95.373479019375
3	11101	low	0.886917960088692	-98.35952025325
4	11102	high	0.28328611898017	-45.4882521227
5	11102	intermediate	0.504792332268371	-56.9948707098418
6	11102	low	0.934924078091106	-98.4651294222738
7	11103	high	0.261467889908257	-49.0174151605263
8	11103	intermediate	0.335766423357664	-63.7699247657609
9	11103	low	0.87719298245614	-96.2725426845
10	11104	high	0.137078651685393	-51.6273715901639
11	11104	intermediate	0.0965909090909091	-63.9675272352941
12	11104	low	0.875802997858672	-87.0623040464548
13	11105	high	0.116161616161616	-53.3571380934783
14	11105	intermediate	0.193493150684932	-89.043765160708
15	11105	low	0.780434782608696	-94.486399138273
16	11106	high	0.1825	-37.4176285068493
17	11106	intermediate	0.407678244972578	-26.8350207219731
18	11106	low	0.85395537525355	-92.4184367410926
19	11107	high	0.161392405063291	-53.675634254902
20	11107	intermediate	0.109923664122137	-32.7700428138889
21	11107	low	0.897654584221748	-92.0945937529691
22	11108	high	0.00253807106598985	-24.6912642
23	11108	intermediate	0.179487179487179	-16.2819326420168
24	11108	low	0.430809399477807	-46.0331430539394
25	11109	high	0.00258397932816537	-18.6145212
26	11109	intermediate	0.211508553654743	-15.6563075897059
27	11109	low	0.534146341463415	-68.7814926351598
28	11201	high	0.0388768898488121	-21.6491713623333
29	11201	intermediate	0.105580693815988	-29.6911426181
30	11201	low	0.375796178343949	-60.014395449322
31	11202	high	0.0305343511450382	-32.7685180625
32	11202	intermediate	0.147008547008547	-25.4681466186047
33	11202	low	0.486404833836858	-67.1898572714286
34	11204	high	0.0459518599562363	-46.27741653
35	11204	intermediate	0.119771863117871	-37.28505159
36	11204	low	0.553610503282276	-72.0719543968775
37	11205	high	0.0637860082304527	-32.7236270645161
38	11205	intermediate	0.2192	-36.0879644583942
39	11205	low	0.413373860182371	-60.0829271838235
40	11206	high	0.0755208333333333	-52.3709867310345
41	11206	intermediate	0.382758620689655	-82.045926562027
42	11206	low	0.512605042016807	-79.7830378692213
43	11207	high	0.139325842696629	-39.4256242258065
44	11207	intermediate	0.201342281879195	-55.2060067
45	11207	low	0.576642335766423	-73.5744486075949
46	11211	high	0.0176470588235294	-18.4309983222222
47	11211	intermediate	0.112068965517241	-30.3022295784615
48	11211	low	0.345714285714286	-59.162826531405
49	11212	high	0.0269662921348315	-52.1554098083333
50	11212	intermediate	0.0798668885191348	-30.7118870395833
51	11212	low	0.383248730964467	-63.8922883629139
52	11213	high	0.0881801125703565	-42.3084330659574
53	11213	intermediate	0.149812734082397	-44.69450563125
54	11213	low	0.388739946380697	-68.6976651875862
55	11214	high	0.0386363636363636	-21.0985006117647
56	11214	intermediate	0.0987868284228769	-27.1991089578947
57	11214	low	0.321513002364066	-64.1202437051471
58	11215	high	0.0382882882882883	-23.1363939941176
59	11215	intermediate	0.126666666666667	-28.2245597605263
60	11215	low	0.305555555555556	-57.7020258545455
61	11216	high	0.0301624129930394	-34.4321632461538
62	11216	intermediate	0.0692717584369449	-31.0155280948718
63	11216	low	0.349775784753363	-62.7130382371795
64	11217	high	0.0440528634361234	-29.32921014
65	11217	intermediate	0.105902777777778	-25.9362896098361
66	11217	low	0.329268292682927	-58.3306554511111
67	11218	high	0.0478260869565217	-46.3416876909091
68	11218	intermediate	0.103594080338266	-41.2772809855102
69	11218	low	0.658777120315582	-76.7791256922156
70	11219	high	0.0334821428571429	-52.80856368
71	11219	intermediate	0.0717948717948718	-80.0477411166667
72	11219	low	0.754299754299754	-85.2012485915309
73	11220	high	0.0548523206751055	-33.0847223961538
74	11220	intermediate	0.115635179153094	-35.5642059985915
75	11220	low	0.514204545454545	-70.9791374127072
76	11230	high	0.02734375	-44.9705262714286
77	11230	intermediate	0.101933216168717	-34.1099924431035
78	11230	low	0.568245125348189	-74.2477193965686
79	11240	high	0.102974828375286	-25.37873196
80	11240	intermediate	0.205834683954619	-31.0585091086614
81	11240	low	0.432642487046632	-68.9541900778443
82	11260	high	0.113022113022113	-40.1409143304348
83	11260	intermediate	0.164948453608247	-24.1436438760417
84	11260	low	0.567627494456763	-78.3577176636719
85	11270	high	0.0310421286031042	-48.3483300714286
86	11270	intermediate	0.0724876441515651	-29.3045194772727
87	11270	low	0.476439790575916	-65.2928867747253
88	11280	high	0.0245535714285714	-20.0717066363636
89	11280	intermediate	0.0758513931888545	-19.3640835571429
90	11280	low	0.315028901734104	-47.4307091137615
91	11290	high	0.0285087719298246	-37.6835794615385
92	11290	intermediate	0.0822981366459627	-28.8186217830189
93	11290	low	0.376470588235294	-56.09440181875
94	11400	high	0.00218340611353712	-2.359454
95	11400	intermediate	0.0339256865912763	-31.6610251904762
96	11400	low	0.239669421487603	-51.275576045977
97	11421	high	0	0
98	11421	intermediate	0.0244274809160305	-27.28130511875
99	11421	low	0.0310077519379845	-54.51375625
100	11422	high	0.0062111801242236	-19.5075066666667
101	11422	intermediate	0.0151057401812689	-34.6483223
102	11422	low	0.240677966101695	-49.5769549169014
103	11424	high	0.0020746887966805	-16.95128
104	11424	intermediate	0.0169230769230769	-27.0325776363636
105	11424	low	0.0909090909090909	-38.8344151785714
106	11425	high	0.00189393939393939	-49.0930786
107	11425	intermediate	0.032590051457976	-15.9019575826316
108	11425	low	0.124620060790274	-31.003029977561
109	11426	high	0.033112582781457	-42.2029226666667
110	11426	intermediate	0.0851528384279476	-32.073898674359
111	11426	low	0.35538752362949	-75.4817871718085
112	11427	high	0.00200400801603206	-28.3520602
113	11427	intermediate	0.00813008130081301	-16.95108224
114	11427	low	0.125766871165644	-32.3056324756098
115	11428	high	0.00212314225053079	-3.454078
116	11428	intermediate	0.0188383045525903	-15.0759360333333
117	11428	low	0.0903614457831325	-41.5351990966667
118	11429	high	0	0
119	11429	intermediate	0.037037037037037	-16.3412866333333
120	11429	low	0.094488188976378	-34.872105
121	11441	high	0.00506756756756757	-8.43008833333333
122	11441	intermediate	0.0207336523125997	-24.6742536153846
123	11441	low	0.235294117647059	-50.5483773923077
124	11442	high	0.0538302277432712	-45.3584535384615
125	11442	intermediate	0.073490813648294	-61.8617974928571
126	11442	low	0.368055555555556	-68.5185667089623
127	11443	high	0	0
128	11443	intermediate	0.0103092783505155	-24.1207303883333
129	11443	low	0.288321167883212	-46.4507413429114
130	11444	high	0.00404858299595142	-13.506014
131	11444	intermediate	0.0125984251968504	-27.88263525
132	11444	low	0.19935691318328	-51.6548096612903
133	11446	high	0	0
134	11446	intermediate	0.0167173252279635	-30.5096846363636
135	11446	low	0.277777777777778	-59.0501871625
136	11447	high	0	0
137	11447	intermediate	0.00191938579654511	-50.2650195
138	11447	low	0.260714285714286	-46.8106675123288
139	11448	high	0	0
140	11448	intermediate	0.00604838709677419	-23.3650963333333
141	11448	low	0.217687074829932	-43.73105309375
142	11449	high	0	0
143	11449	intermediate	0.00444444444444444	-21.7727945
144	11449	low	0.162079510703364	-36.1248790698113
145	11450	high	0.00172413793103448	-9.957014
146	11450	intermediate	0.00336700336700337	-28.2935915
147	11450	low	0.236842105263158	-50.2321069444444
148	11460	high	0.00357142857142857	-8.06620055
149	11460	intermediate	0.0685543964232489	-14.8910187282609
150	11460	low	0.363636363636364	-49.4148165894737
151	11470	high	0.0036697247706422	-3.02900065
152	11470	intermediate	0.0447552447552448	-15.40264896875
153	11470	low	0.327777777777778	-51.6862474813559
154	11480	high	0.00912408759124088	-25.9344424
155	11480	intermediate	0.0415472779369628	-25.2004605172414
156	11480	low	0.34020618556701	-50.2006923030303
157	11491	high	0.00757575757575758	-27.92220075
158	11491	intermediate	0.0336605890603086	-24.0806670833333
159	11491	low	0.331658291457286	-50.4935094545455
160	11492	high	0.0396659707724426	-36.3769248368421
161	11492	intermediate	0.0911901081916538	-35.0775732644068
162	11492	low	0.420382165605096	-58.5843693795455
163	11493	high	0.0072202166064982	-27.254651925
164	11493	intermediate	0.0436893203883495	-22.1839699592593
165	11493	low	0.279850746268657	-39.230917296
166	11494	high	0.00984251968503937	-26.90205346
167	11494	intermediate	0.126315789473684	-22.4658042638889
168	11494	low	0.464088397790055	-57.0581566910714
169	11495	high	0	0
170	11495	intermediate	0.0302571860816944	-29.725516
171	11495	low	0.299319727891156	-72.0673594772727
172	11496	high	0.012847965738758	-26.5981824333333
173	11496	intermediate	0.175337186897881	-23.0646106032967
174	11496	low	0.495594713656388	-50.6907123573333
175	11497	high	0.00183823529411765	-0.3810473
176	11497	intermediate	0.023728813559322	-24.8837659071429
177	11497	low	0.277777777777778	-52.1288640270588
178	11498	high	0	0
179	11498	intermediate	0.0187713310580205	-24.1424971818182
180	11498	low	0.278846153846154	-50.9176280609195
181	11499	high	0	0
182	11499	intermediate	0.01669449081803	-26.0352148
183	11499	low	0.265957446808511	-50.3807363466667
184	11510	high	0	0
185	11510	intermediate	0	0
186	11510	low	0	0
187	11520	high	0.0242537313432836	-21.89186
188	11520	intermediate	0.0222634508348794	-34.1668055
189	11520	low	0.063013698630137	-44.0813976521739
190	11530	high	0	0
191	11530	intermediate	0.00409836065573771	-16.9407713333333
192	11530	low	0.0592105263157895	-50.922375
193	11542	high	0	0
194	11542	intermediate	0	0
195	11542	low	0.161290322580645	-85.66085875
196	11543	high	0	0
197	11543	intermediate	0	0
198	11543	low	0.13953488372093	-22.4147903333333
199	11544	high	0	0
200	11544	intermediate	0	0
201	11544	low	0.181818181818182	-46.8918011142857
202	11545	high	0	0
203	11545	intermediate	0	0
204	11545	low	0.166212534059946	-47.2283435508197
205	11546	high	0	0
206	11546	intermediate	0	0
207	11546	low	0.14867617107943	-39.6012641945205
208	11547	high	0	0
209	11547	intermediate	0	0
210	11547	low	0.136612021857924	-31.925925932
211	11548	high	0	0
212	11548	intermediate	0	0
213	11548	low	0.115966386554622	-35.9763315347826
214	11549	high	0	0
215	11549	intermediate	0	0
216	11549	low	0.114814814814815	-38.2246934354839
217	11550	high	0.0016750418760469	-20.94344
218	11550	intermediate	0.00675675675675676	-35.69049
219	11550	low	0.175298804780877	-67.5391045454545
220	11560	high	0.00552486187845304	-10.1655079333333
221	11560	intermediate	0.025260029717682	-26.5265524352941
222	11560	low	0.290178571428571	-77.1601349507692
223	11571	high	0	0
224	11571	intermediate	0	0
225	11571	low	0	0
226	11573	high	0.0192307692307692	-30.0587132222222
227	11573	intermediate	0.0465793304221252	-38.246225375
228	11573	low	0.308771929824561	-55.6677424545455
229	11574	high	0.00852878464818763	-13.01472485
230	11574	intermediate	0.0475435816164818	-20.2608795033333
231	11574	low	0.302941176470588	-54.7884136893204
232	11575	high	0.00242718446601942	-13.555185
233	11575	intermediate	0.0686767169179229	-31.1232768536585
234	11575	low	0.512761020881671	-64.3539861266968
235	11580	high	0	0
236	11580	intermediate	0.0616438356164384	-20.1717158717778
237	11580	low	0.416216216216216	-35.8817881681169
238	11590	high	0	0
239	11590	intermediate	0	0
240	11590	low	0.0363636363636364	-22.88184575
241	11600	high	0	0
242	11600	intermediate	0.0185567010309278	-4.12068988888889
243	11600	low	0.0097799511002445	-6.017802
244	11700	high	0	0
245	11700	intermediate	0.025974025974026	-7.87332862
246	11700	low	0.33041958041958	-74.8905537402116
247	11710	high	0	0
248	11710	intermediate	0.01669449081803	-14.4539102
249	11710	low	0.072	-19.3430645555556
250	11720	high	0	0
251	11720	intermediate	0.00306278713629403	-6.7837315
252	11720	low	0.0181818181818182	-17.4497214
253	11730	high	0	0
254	11730	intermediate	0.00363636363636364	-6.098338685
255	11730	low	0.108778625954198	-21.5631011350877
256	11732	high	0	0
257	11732	intermediate	0.00843170320404722	-26.1366462
258	11732	low	0.0679012345679012	-31.0172524545455
259	11733	high	0	0
260	11733	intermediate	0.00160771704180064	-3.642015
261	11733	low	0.0852459016393443	-35.6266600384615
262	11734	high	0	0
263	11734	intermediate	0	0
264	11734	low	0.0688073394495413	-27.1210813333333
265	11735	high	0.0054249547920434	-13.414381
266	11735	intermediate	0.0281879194630872	-16.7822843333333
267	11735	low	0.0563380281690141	-27.0380395
268	11736	high	0.00559701492537313	-14.6343633333333
269	11736	intermediate	0.0309090909090909	-24.8190955294118
270	11736	low	0.0734463276836158	-31.7971534615385
271	11738	high	0.00591715976331361	-15.4320993333333
272	11738	intermediate	0.0255972696245734	-20.898196
273	11738	low	0.0489913544668588	-22.6831547647059
274	11739	high	0	0
275	11739	intermediate	0.00232558139534884	-0.9804014
276	11739	low	0.0198237885462555	-45.5581149555556
277	11740	high	0	0
278	11740	intermediate	0.0244821092278719	-17.2951666923077
279	11740	low	0.103448275862069	-41.5509613571429
280	11741	high	0	0
281	11741	intermediate	0	0
282	11741	low	0.0157657657657658	-45.49804
283	11742	high	0.0271739130434783	-35.4724071333333
284	11742	intermediate	0.0613287904599659	-23.6093506841667
285	11742	low	0.119601328903654	-50.0707662944444
286	11743	high	0	0
287	11743	intermediate	0	0
288	11743	low	0.0157657657657658	-41.2843042857143
289	11744	high	0	0
290	11744	intermediate	0	0
291	11744	low	0.0940325497287523	-28.4771350115385
292	11745	high	0	0
293	11745	intermediate	0.0200927357032458	-19.0700221384615
294	11745	low	0.122529644268775	-41.4756671387097
295	11746	high	0	0
296	11746	intermediate	0.0041407867494824	-4.3942979
297	11746	low	0.0989690721649484	-31.6197146083333
298	11747	high	0.00489396411092985	-5.215729
299	11747	intermediate	0.0307167235494881	-24.5408842166667
300	11747	low	0.0912863070539419	-61.90834665
301	11748	high	0	0
302	11748	intermediate	0.0167224080267559	-17.8383906
303	11748	low	0.0716666666666667	-16.5059998953488
304	11749	high	0	0
305	11749	intermediate	0.00833333333333333	-0.71488416
306	11749	low	0.320712694877506	-56.8492887716667
307	11750	high	0	0
308	11750	intermediate	0	0
309	11750	low	0.137724550898204	-31.2399346866304
310	11761	high	0	0
311	11761	intermediate	0	0
312	11761	low	0.189069423929099	-27.6386610101563
313	11762	high	0	0
314	11762	intermediate	0.00906344410876133	-16.0739256666667
315	11762	low	0.155448717948718	-46.1614952670103
316	11763	high	0	0
317	11763	intermediate	0	0
318	11763	low	0.0617647058823529	-34.1135770595238
319	11764	high	0	0
320	11764	intermediate	0	0
321	11764	low	0.126284875183554	-41.0001968883721
322	11765	high	0	0
323	11765	intermediate	0	0
324	11765	low	0.105263157894737	-36.4943942889722
325	11766	high	0	0
326	11766	intermediate	0	0
327	11766	low	0.0756676557863502	-29.6219209431373
328	11767	high	0	0
329	11767	intermediate	0	0
330	11767	low	0.0680786686838124	-26.5081081488889
331	11768	high	0	0
332	11768	intermediate	0.00595238095238095	-2.9131042
333	11768	low	0.107692307692308	-47.6369950638095
334	11769	high	0	0
335	11769	intermediate	0	0
336	11769	low	0.0790273556231003	-34.2421860346154
337	11770	high	0	0
338	11770	intermediate	0	0
339	11770	low	0.0816023738872404	-35.6504085545455
340	11780	high	0	0
341	11780	intermediate	0.0182232346241458	-13.7613074875
342	11780	low	0.147110332749562	-30.2497130821429
343	11791	high	0	0
344	11791	intermediate	0.0269662921348315	-9.21935333333333
345	11791	low	0.186346863468635	-40.6074257
346	11792	high	0	0
347	11792	intermediate	0.0512820512820513	-16.4608957185
348	11792	low	0.158597662771285	-34.1520654222105
349	11793	high	0	0
350	11793	intermediate	0.0254237288135593	-8.31299488888889
351	11793	low	0.262987012987013	-55.0110786854938
352	11794	high	0	0
353	11794	intermediate	0.00401606425702811	-9.021861
354	11794	low	0.192572214580468	-29.5026172515714
355	11795	high	0	0
356	11795	intermediate	0.0121580547112462	-20.791753175
357	11795	low	0.237366003062787	-26.962959596129
358	11796	high	0	0
359	11796	intermediate	0.0204081632653061	-15.8606535
360	11796	low	0.195845697329377	-27.8655047522727
361	11797	high	0.00867678958785249	-33.884682725
362	11797	intermediate	0.053030303030303	-27.0102560428571
363	11797	low	0.286713286713287	-32.6045494780488
364	11798	high	0	0
365	11798	intermediate	0.0190930787589499	-20.118148
366	11798	low	0.179962894248609	-37.7657430412371
367	12100	high	0	0
368	12100	intermediate	0.00263157894736842	-4.19229565
369	12100	low	0.114093959731544	-7.88139461764706
370	12210	high	0	0
371	12210	intermediate	0	0
372	12210	low	0.302469135802469	-7.45514735795918
373	12221	high	0.0105263157894737	-23.1777074833333
374	12221	intermediate	0.0581395348837209	-12.934745545
375	12221	low	0.14828897338403	-23.1572834615385
376	12222	high	0	0
377	12222	intermediate	0.004739336492891	-14.43490955
378	12222	low	0.398945518453427	-44.7054821048458
379	12223	high	0	0
380	12223	intermediate	0	0
381	12223	low	0.0711864406779661	-14.7304102833333
382	12224	high	0.00203252032520325	-15.1225613
383	12224	intermediate	0.0134529147982063	-11.2313386166667
384	12224	low	0.292828685258964	-54.8072137673469
385	12225	high	0	0
386	12225	intermediate	0.0162162162162162	-9.38519827777778
387	12225	low	0.121428571428571	-14.8550722803922
388	12226	high	0	0
389	12226	intermediate	0.00211864406779661	-5.6192455
390	12226	low	0.205588822355289	-38.4376838864078
391	12227	high	0	0
392	12227	intermediate	0.0159574468085106	-11.1177782166667
393	12227	low	0.0738738738738739	-11.9804581902439
394	12228	high	0	0
395	12228	intermediate	0.00643086816720257	-19.5872617
396	12228	low	0.0329289428076256	-14.7037636421053
397	12229	high	0	0
398	12229	intermediate	0.00675675675675676	-20.3545175
399	12229	low	0.0321489001692047	-11.5908211157895
400	12231	high	0	0
401	12231	intermediate	0	0
402	12231	low	0.393939393939394	-8.76093252646154
403	12232	high	0	0
404	12232	intermediate	0	0
405	12232	low	0.146422628951747	-19.3731560954545
406	12233	high	0	0
407	12233	intermediate	0	0
408	12233	low	0.397590361445783	-9.76950282424242
409	12234	high	0	0
410	12234	intermediate	0.0072992700729927	-10.5598865
411	12234	low	0.232365145228216	-27.3653185093452
412	12235	high	0	0
413	12235	intermediate	0	0
414	12235	low	0.422619047619048	-10.2361371830986
415	12236	high	0	0
416	12236	intermediate	0	0
417	12236	low	0.210443037974684	-37.7058948886466
418	12237	high	0	0
419	12237	intermediate	0	0
420	12237	low	0.429447852760736	-11.2628157857143
421	12238	high	0	0
422	12238	intermediate	0.0209059233449477	-8.860809
423	12238	low	0.201388888888889	-23.6815259735632
424	12241	high	0	0
425	12241	intermediate	0	0
426	12241	low	0.0677165354330709	-11.085787024186
427	12242	high	0	0
428	12242	intermediate	0	0
429	12242	low	0.140065146579805	-24.1019923302326
430	12243	high	0	0
431	12243	intermediate	0	0
432	12243	low	0.0473186119873817	-9.061873558
433	12244	high	0	0
434	12244	intermediate	0	0
435	12244	low	0.49	-47.6985471854227
436	12245	high	0	0
437	12245	intermediate	0.00555555555555556	-3.2855212
438	12245	low	0.17595818815331	-42.9244237039604
439	12246	high	0	0
440	12246	intermediate	0	0
441	12246	low	0.127941176470588	-52.3561326206897
442	12247	high	0	0
443	12247	intermediate	0.00554016620498615	-6.705824445
444	12247	low	0.144876325088339	-42.2867844035366
445	12248	high	0	0
446	12248	intermediate	0	0
447	12248	low	0.133956386292835	-37.3902937627907
448	12249	high	0	0
449	12249	intermediate	0.017632241813602	-6.10961966285714
450	12249	low	0.128544423440454	-48.8274545570588
451	12250	high	0	0
452	12250	intermediate	0	0
453	12250	low	0.49390243902439	-9.82406811851852
454	12261	high	0	0
455	12261	intermediate	0.0309597523219814	-8.54607812
456	12261	low	0.274137931034483	-24.5019154767296
457	12262	high	0	0
458	12262	intermediate	0	0
459	12262	low	0.20097244732577	-70.2284378830645
460	12263	high	0	0
461	12263	intermediate	0.00343642611683849	-13.9156079
462	12263	low	0.324409448818898	-15.5183674640777
463	12264	high	0	0
464	12264	intermediate	0	0
465	12264	low	0.0980683506686478	-32.5683812151515
466	12265	high	0	0
467	12265	intermediate	0.0188087774294671	-9.41580383333333
468	12265	low	0.350734094616639	-18.0664879836744
469	12266	high	0.00189753320683112	-5.416619
470	12266	intermediate	0.0231660231660232	-15.0217171666667
471	12266	low	0.301223241590214	-23.6335500509137
472	12267	high	0	0
473	12267	intermediate	0.0191693290734824	-9.40875183333333
474	12267	low	0.330081300813008	-17.7761502724138
475	12268	high	0	0
476	12268	intermediate	0	0
477	12268	low	0.348797250859107	-23.8100664840394
478	12269	high	0	0
479	12269	intermediate	0.0119047619047619	-7.99669933333333
480	12269	low	0.262931034482759	-19.1069696453552
481	12271	high	0	0
482	12271	intermediate	0	0
483	12271	low	0.464705882352941	-10.6142932493671
484	12272	high	0	0
485	12272	intermediate	0.00356718192627824	-2.72263946666667
486	12272	low	0	0
487	12273	high	0	0
488	12273	intermediate	0.0123711340206186	-10.6787247483333
489	12273	low	0.1252408477842	-33.0040085438462
490	12274	high	0.0082135523613963	-35.511394
491	12274	intermediate	0.0268292682926829	-20.4929623636364
492	12274	low	0.154696132596685	-51.3184432857143
493	12275	high	0	0
494	12275	intermediate	0	0
495	12275	low	0.325174825174825	-30.4217578333333
496	12276	high	0.00888888888888889	-29.7490431755
497	12276	intermediate	0.0534653465346535	-11.9123066232222
498	12276	low	0.222680412371134	-43.1360797611111
499	12277	high	0	0
500	12277	intermediate	0	0
501	12277	low	0.336236933797909	-29.0981731139896
502	12278	high	0	0
503	12278	intermediate	0.00201612903225806	-3.8531969
504	12278	low	0.228155339805825	-33.8040875340426
505	12279	high	0	0
506	12279	intermediate	0	0
507	12279	low	0.313893653516295	-18.8476562136612
508	12281	high	0.00183150183150183	-9.3410468
509	12281	intermediate	0.00706713780918728	-0.27365232
510	12281	low	0.250409165302782	-33.1210775484967
511	12282	high	0	0
512	12282	intermediate	0.0173410404624277	-23.0423726
513	12282	low	0.300536672629696	-38.6711553875
514	12283	high	0.00184162062615101	-1.326155
515	12283	intermediate	0.0264423076923077	-13.3332830909091
516	12283	low	0.268191268191268	-39.2419753333333
517	12284	high	0.0111111111111111	-28.3755845
518	12284	intermediate	0.0460829493087558	-26.135162945
519	12284	low	0.508583690987124	-55.3197344253165
520	12285	high	0.00182481751824818	-2.201072
521	12285	intermediate	0.0317848410757946	-15.6157697615385
522	12285	low	0.260869565217391	-38.9059239793651
523	12286	high	0.00373134328358209	-46.54180277
524	12286	intermediate	0.0539906103286385	-23.2474257417391
525	12286	low	0.364016736401674	-71.7097252861494
526	12287	high	0.00412371134020619	-35.086136
527	12287	intermediate	0.0367816091954023	-24.0142841875
528	12287	low	0.151923076923077	-39.454540935443
529	12288	high	0.00589390962671906	-37.1673679
530	12288	intermediate	0.0126582278481013	-21.64414238
531	12288	low	0.343283582089552	-73.9818046038043
532	12289	high	0.00202429149797571	-45.990301
533	12289	intermediate	0.0122549019607843	-11.2664516
534	12289	low	0.278810408921933	-74.0914172733333
535	12291	high	0	0
536	12291	intermediate	0	0
537	12291	low	0.243339253996448	-21.1459967007299
538	12292	high	0	0
539	12292	intermediate	0	0
540	12292	low	0.262786596119929	-27.4706862181208
541	12293	high	0	0
542	12293	intermediate	0	0
543	12293	low	0.194398682042834	-28.7339580961864
544	12294	high	0	0
545	12294	intermediate	0.00949367088607595	-7.71973233333333
546	12294	low	0.349442379182156	-23.9400069808511
547	12295	high	0	0
548	12295	intermediate	0	0
549	12295	low	0.265938069216758	-26.7549007285616
550	12296	high	0	0
551	12296	intermediate	0	0
552	12296	low	0.226016260162602	-17.7690485021583
553	12297	high	0	0
554	12297	intermediate	0.00634920634920635	-1.8922675
555	12297	low	0.30410447761194	-21.7952964251534
556	12298	high	0	0
557	12298	intermediate	0.00604229607250755	-6.4060382
558	12298	low	0.209393346379648	-43.1798167654206
559	12299	high	0	0
560	12299	intermediate	0	0
561	12299	low	0.271153846153846	-66.4572299929078
562	12301	high	0	0
563	12301	intermediate	0	0
564	12301	low	0.300613496932515	-7.35871227755102
565	12302	high	0	0
566	12302	intermediate	0.0272108843537415	-4.878993375
567	12302	low	0.18273381294964	-29.7400506043307
568	12303	high	0.00428265524625268	-40.2547058
569	12303	intermediate	0.0330188679245283	-27.6362461285714
570	12303	low	0.204993429697766	-39.2502384166667
571	12304	high	0	0
572	12304	intermediate	0.0159744408945687	-5.085717526
573	12304	low	0.0922619047619048	-17.9786427419355
574	12305	high	0	0
575	12305	intermediate	0.0149892933618844	-4.72836074285714
576	12305	low	0.164989939637827	-18.9610698304878
577	12306	high	0.00211864406779661	-9.29558406
578	12306	intermediate	0.016359918200409	-10.5354151675
579	12306	low	0.129436325678497	-21.9051171264516
580	12307	high	0.00213675213675214	-2.5433218
581	12307	intermediate	0.0124223602484472	-11.2384721965
582	12307	low	0.134969325153374	-21.3076382839545
583	12308	high	0.119140625	-26.0249961655738
584	12308	intermediate	0.287878787878788	-36.1159901526316
585	12308	low	0.559880239520958	-67.8996841272727
586	12309	high	0.14453125	-29.4295382445946
587	12309	intermediate	0.22803738317757	-26.2589865106557
588	12309	low	0.740458015267176	-84.6479808621993
589	12410	high	0.0505709624796085	-18.1552713096774
590	12410	intermediate	0.130637636080871	-27.0201619928571
591	12410	low	0.0326086956521739	-38.6581275
592	12420	high	0	0
593	12420	intermediate	0.00704225352112676	-20.5038457666667
594	12420	low	0.230769230769231	-28.7070071587719
595	12430	high	0.0450885668276973	-16.0291719857143
596	12430	intermediate	0.125786163522013	-26.15096891875
597	12430	low	0.0327868852459016	-38.1841696666667
598	12440	high	0.0485133020344288	-21.1981571612903
599	12440	intermediate	0.23951048951049	-22.6940406036496
600	12440	low	0.305676855895196	-76.8141613728571
601	12450	high	0.0378787878787879	-40.4177899
602	12450	intermediate	0.0768136557610242	-32.9867381111111
603	12450	low	0.229665071770335	-35.6717807958333
604	12460	high	0.0564663023679417	-31.9175356419355
605	12460	intermediate	0.106976744186047	-33.630230826087
606	12460	low	0.17479674796748	-44.3032330790698
607	12470	high	0.0874785591766724	-39.6655568490196
608	12470	intermediate	0.0906040268456376	-42.4525004962963
609	12470	low	0.436781609195402	-79.5562170868421
610	12480	high	0.0646950092421442	-36.67220436
611	12480	intermediate	0.175	-36.1512494991597
612	12480	low	0.328767123287671	-55.3218953111111
613	12492	high	0.0519713261648745	-22.4367196172414
614	12492	intermediate	0.275477707006369	-28.9063778606936
615	12492	low	0.618110236220472	-70.8138301343949
616	12493	high	0.0615942028985507	-32.9846784411765
617	12493	intermediate	0.118556701030928	-40.4826467318841
618	12493	low	0.428104575163399	-82.9522835343511
619	12494	high	0.0438095238095238	-34.1671455652174
620	12494	intermediate	0.105902777777778	-37.1905079147541
621	12494	low	0.722713864306785	-63.4838640489796
622	12495	high	0.0421792618629174	-54.9433528333333
623	12495	intermediate	0.129597197898424	-26.2866455716216
624	12495	low	0.513333333333333	-81.9430036818182
625	12496	high	0.0529100529100529	-38.227348
626	12496	intermediate	0.122950819672131	-34.56874844
627	12496	low	0.334600760456274	-64.7221299204545
628	12498	high	0.0353356890459364	-40.302421935
629	12498	intermediate	0.14484126984127	-32.3681761861644
630	12498	low	0.578378378378378	-62.4247889048598
631	12499	high	0.0247787610619469	-48.9001466714286
632	12499	intermediate	0.0847457627118644	-20.5477598775
633	12499	low	0.640198511166253	-66.3679833864341
634	12510	high	0.131679389312977	-38.3385224347826
635	12510	intermediate	0.274047186932849	-37.9472349397351
636	12510	low	0.558904109589041	-67.9209871651961
637	12520	high	0.0257289879931389	-27.358121914
638	12520	intermediate	0.118705035971223	-22.0663680881818
639	12520	low	0.242524916943522	-31.7008571308219
640	12530	high	0	0
641	12530	intermediate	0.0794979079497908	-13.2032217763158
642	12530	low	0.195505617977528	-18.8991090494253
643	12540	high	0.00896057347670251	-10.19600286
644	12540	intermediate	0.158854166666667	-16.4096054459016
645	12540	low	0.543859649122807	-43.6019186870968
646	12551	high	0	0
647	12551	intermediate	0.110764430577223	-15.0702052507042
648	12551	low	0.24812030075188	-25.3707714727273
649	12552	high	0.0143884892086331	-15.60888375
650	12552	intermediate	0.126878130217028	-27.8140279738158
651	12552	low	0.23859649122807	-39.6463220852941
652	12553	high	0	0
653	12553	intermediate	0.00530035335689046	-10.4238023333333
654	12553	low	0.0392156862745098	-57.242995
655	12554	high	0	0
656	12554	intermediate	0.0124826629680999	-15.3281396666667
657	12554	low	0	0
658	12555	high	0	0
659	12555	intermediate	0.011444921316166	-17.10171425
660	12555	low	0.00833333333333333	-14.1133
661	12556	high	0	0
662	12556	intermediate	0.0382262996941896	-26.5073048
663	12556	low	0.17687074829932	-48.9340330384615
664	12557	high	0.00626959247648903	-21.54971875
665	12557	intermediate	0.0263620386643234	-28.6345352666667
666	12557	low	0.44206008583691	-74.3553698252427
667	12558	high	0.012779552715655	-29.16148428625
668	12558	intermediate	0.0313531353135314	-35.0459943752632
669	12558	low	0.375	-84.4622900597436
670	12559	high	0.00656814449917898	-26.528047775
671	12559	intermediate	0.086232980332829	-25.5556469596491
672	12559	low	0.5	-78.8307873776471
673	12560	high	0.00632911392405063	-9.84100775
674	12560	intermediate	0.0590111642743222	-27.0661961891892
675	12560	low	0.464088397790055	-73.9898256547619
676	12580	high	0.0222575516693164	-19.3228631785714
677	12580	intermediate	0.0611888111888112	-34.34951904
678	12580	low	0.765690376569038	-84.0783177579235
679	12590	high	0	0
680	12590	intermediate	0.0896860986547085	-13.031208925
681	12590	low	0.559071729957806	-53.7185587449057
682	12600	high	0.0390492359932088	-34.4371640434783
683	12600	intermediate	0.0665399239543726	-56.2571912742857
684	12600	low	0.529230769230769	-72.9420085348837
685	12601	high	0.00808080808080808	-23.486328675
686	12601	intermediate	0.182634730538922	-23.7449549239344
687	12601	low	0.761047463175123	-74.6741989211183
688	12602	high	0	0
689	12602	intermediate	0.181578947368421	-13.2735127057971
690	12602	low	0.576335877862595	-68.0322057281457
691	12603	high	0.010183299389002	-23.17333826
692	12603	intermediate	0.068762278978389	-26.4864611542857
693	12603	low	0.777272727272727	-77.5298785403509
694	12604	high	0.0100200400801603	-26.8860941
695	12604	intermediate	0.08	-28.1531515736842
696	12604	low	0.796137339055794	-77.2474382660377
697	12605	high	0.0769230769230769	-26.0957872462857
698	12605	intermediate	0.456582633053221	-34.4463012311043
699	12605	low	0.697452229299363	-72.334806396621
700	12606	high	0.0176470588235294	-18.0098790555556
701	12606	intermediate	0.0476190476190476	-37.9823593789474
702	12606	low	0.495291902071563	-60.6235056414449
703	12607	high	0.0505747126436782	-34.8418343636364
704	12607	intermediate	0.456575682382134	-51.9280131673913
705	12607	low	0.654485049833887	-81.9438919540609
706	12608	high	0	0
707	12608	intermediate	0.0124113475177305	-20.8612828571429
708	12608	low	0.369747899159664	-61.7148732045455
709	12609	high	0.0123456790123457	-37.010863
710	12609	intermediate	0.0746812386156648	-19.0976439512195
711	12609	low	0.535802469135802	-79.8331036221198
712	12710	high	0.00623052959501558	-17.4001305
713	12710	intermediate	0.0447761194029851	-39.5987573333333
714	12710	low	0.140625	-74.2055956666667
715	12720	high	0.012987012987013	-21.2526401666667
716	12720	intermediate	0.0230263157894737	-35.9666374285714
717	12720	low	0.194594594594595	-41.1173255833333
718	12730	high	0.0108527131782946	-12.6529324414286
719	12730	intermediate	0.0496987951807229	-32.956090990303
720	12730	low	0.183206106870229	-74.8650801116667
721	12740	high	0.0193423597678917	-23.3180357
722	12740	intermediate	0.0276967930029155	-26.0579499473684
723	12740	low	0.0421940928270042	-44.3293727
724	12741	high	0.0245283018867925	-54.0382068461538
725	12741	intermediate	0.01985559566787	-63.9104254545455
726	12741	low	0.469101123595506	-65.4095429760479
727	12742	high	0.0318352059925094	-43.9750294647059
728	12742	intermediate	0.0183823529411765	-44.28691623
729	12742	low	0.406077348066298	-65.9869673993197
730	12744	high	0.0191570881226054	-26.03515997
731	12744	intermediate	0.0238095238095238	-36.6168319785714
732	12744	low	0.239393939393939	-44.1728478696203
733	12746	high	0.0262008733624454	-38.4145646666667
734	12746	intermediate	0.0248344370860927	-36.5894398
735	12746	low	0.489417989417989	-62.5041078637838
736	12747	high	0.0711462450592885	-22.7193673566111
737	12747	intermediate	0.0994764397905759	-26.902769685386
738	12747	low	0.135734072022161	-57.6150037795918
739	12748	high	0.150375939849624	-43.3636680135
740	12748	intermediate	0.121359223300971	-47.9708262164
741	12748	low	0.560483870967742	-69.7022371569065
742	12749	high	0.0675675675675676	-26.2460709565714
743	12749	intermediate	0.134328358208955	-43.3836784884127
744	12749	low	0.534216335540839	-60.3865731252479
745	12750	high	0.164615384615385	-41.3303667383178
746	12750	intermediate	0.213942307692308	-67.8627940337079
747	12750	low	0.248663101604278	-88.7609374408602
748	12760	high	0.0232172470978441	-41.2791219285714
749	12760	intermediate	0.0257648953301127	-29.111175125
750	12760	low	0.597222222222222	-87.6195973255814
751	12770	high	0.00597907324364723	-24.61045425
752	12770	intermediate	0.0534124629080119	-30.1287791388889
753	12770	low	0.402061855670103	-80.4595095897436
754	12780	high	0	0
755	12780	intermediate	0.0257879656160458	-17.0251238888889
756	12780	low	0.192982456140351	-55.4774887272727
757	12792	high	0	0
758	12792	intermediate	0.00171526586620926	-16.82658
759	12792	low	0.311023622047244	-91.8160483544304
760	12793	high	0.0122137404580153	-25.87132091875
761	12793	intermediate	0.12106135986733	-35.049033449589
762	12793	low	0.258241758241758	-74.8748440687234
763	12794	high	0	0
764	12794	intermediate	0.0087719298245614	-43.08476
765	12794	low	0.28	-86.3174906371429
766	12795	high	0.0211480362537764	-29.7046325714286
767	12795	intermediate	0.173419773095624	-38.8043485046729
768	12795	low	0.291925465838509	-79.7535390638298
769	12796	high	0.0434782608695652	-27.8211792103448
770	12796	intermediate	0.131578947368421	-36.97880452
771	12796	low	0.275590551181102	-72.80690648
772	12797	high	0.0286168521462639	-25.5636311666667
773	12797	intermediate	0.0426829268292683	-46.5171315
774	12797	low	0.27741935483871	-72.5424765348837
775	12798	high	0.0192307692307692	-23.3538508
776	12798	intermediate	0.0487329434697856	-32.682793732
777	12798	low	0.297029702970297	-46.9271966588889
778	12799	high	0.017515923566879	-21.1315814545455
779	12799	intermediate	0.0616966580976864	-30.461364875
780	12799	low	0.297872340425532	-38.0174865
781	12800	high	0.00697674418604651	-40.362743
782	12800	intermediate	0.00561797752808989	-61.3284663333333
783	12800	low	0.394957983193277	-60.3266124797872
784	12801	high	0.0114678899082569	-44.2219722
785	12801	intermediate	0.00945179584120983	-44.342847
786	12801	low	0.328421052631579	-59.5957684487179
787	12802	high	0.00481927710843374	-49.14743365
788	12802	intermediate	0.0181488203266788	-25.97686949
789	12802	low	0.341772151898734	-66.4922929858025
790	12803	high	0	0
791	12803	intermediate	0.00875656742556918	-34.08931012
792	12803	low	0.125	-54.7278740285714
793	12804	high	0.00221729490022173	-40.212348
794	12804	intermediate	0.018348623853211	-11.143096169
795	12804	low	0.119369369369369	-47.9483717735849
796	12805	high	0	0
797	12805	intermediate	0.0137931034482759	-15.9901908625
798	12805	low	0.469767441860465	-58.1160137465347
799	12806	high	0	0
800	12806	intermediate	0.00347222222222222	-9.09346369
801	12806	low	0.495348837209302	-56.5438156433803
802	12808	high	0.004739336492891	-23.696693
803	12808	intermediate	0.0121527777777778	-28.0732477142857
804	12808	low	0.330316742081448	-58.7540768554795
805	12809	high	0	0
806	12809	intermediate	0.012216404886562	-12.1863364285714
807	12809	low	0.310185185185185	-67.8204916940299
808	12902	high	0	0
809	12902	intermediate	0.0150375939849624	-10.4538933275
810	12902	low	0.276353276353276	-26.9850906659794
811	12904	high	0.0145833333333333	-30.4791213285714
812	12904	intermediate	0.0413943355119826	-15.4731644105263
813	12904	low	0.353293413173653	-73.033959780226
814	12906	high	0.00917431192660551	-23.1568056
815	12906	intermediate	0.0325379609544469	-17.3172177906667
816	12906	low	0.124423963133641	-33.0326453646296
817	12908	high	0.00196463654223969	-15.7917169
818	12908	intermediate	0.0360169491525424	-9.11069361764706
819	12908	low	0.276688453159041	-18.8623589086614
820	12909	high	0.0423387096774194	-31.1623192666667
821	12909	intermediate	0.0712530712530713	-20.0872494034483
822	12909	low	0.361266294227188	-55.2081701536083
823	12910	high	0.00347826086956522	-4.839022665
824	12910	intermediate	0.027124773960217	-16.218827286
825	12910	low	0.230769230769231	-26.6980517041667
826	12921	high	0.0514705882352941	-46.766314675
827	12921	intermediate	0.0578358208955224	-46.3991230387097
828	12921	low	0.675	-64.9681952901235
829	12922	high	0.029520295202952	-23.2382958125
830	12922	intermediate	0.0387323943661972	-38.9980469863636
831	12922	low	0.487878787878788	-59.3735115459627
832	12923	high	0.110266159695817	-32.7163783413793
833	12923	intermediate	0.193548387096774	-37.4900374262963
834	12923	low	0.429775280898876	-58.0487350215033
835	12924	high	0.103260869565217	-34.0372544263158
836	12924	intermediate	0.219066937119675	-39.8567320268519
837	12924	low	0.463291139240506	-63.6374218748634
838	12925	high	0.122330097087379	-33.8110739146032
839	12925	intermediate	0.194945848375451	-36.7018815156481
840	12925	low	0.452830188679245	-57.995642816131
841	12927	high	0.115009746588694	-33.9072042237288
842	12927	intermediate	0.187272727272727	-36.345713431068
843	12927	low	0.440318302387268	-59.0841261283133
844	12928	high	0.0885826771653543	-28.3984187555556
845	12928	intermediate	0.156079854809437	-31.6888462325581
846	12928	low	0.4750656167979	-62.295531139779
847	12929	high	0.0453648915187377	-50.1252728695652
848	12929	intermediate	0.0535714285714286	-53.5759252666667
849	12929	low	0.46112600536193	-69.7241690348837
850	12930	high	0	0
851	12930	intermediate	0.0317965023847377	-16.89317425
852	12930	low	0.275	-23.9716269051948
853	12940	high	0.0558464223385689	-27.00994178125
854	12940	intermediate	0.0540540540540541	-27.7277372333333
855	12940	low	0.17910447761194	-28.4793944166667
856	12941	high	0.0718038528896672	-24.8382481097561
857	12941	intermediate	0.212871287128713	-18.8947558604651
858	12941	low	0.190114068441065	-27.055498362
859	12942	high	0.121993127147766	-32.0068294647887
860	12942	intermediate	0.240445859872611	-25.0523826940397
861	12942	low	0.595652173913043	-68.346139149562
862	12943	high	0.269293924466338	-30.7382072365854
863	12943	intermediate	0.336025848142165	-31.4129456596154
864	12943	low	0.570754716981132	-69.1914310710744
865	12944	high	0.08203125	-27.2733082547619
866	12944	intermediate	0.128598848368522	-21.6153010880597
867	12944	low	0.557739557739558	-60.283780907489
868	12946	high	0.176706827309237	-54.3746997170455
869	12946	intermediate	0.124277456647399	-49.4601405860465
870	12946	low	0.645973154362416	-79.8606712179221
871	12947	high	0.0776699029126214	-27.2500246895
872	12947	intermediate	0.127413127413127	-19.4636235492424
873	12947	low	0.515970515970516	-60.86709261
874	12948	high	0.126459143968872	-31.3776970544615
875	12948	intermediate	0.258585858585859	-29.3531901316406
876	12948	low	0.482598607888631	-62.0102433312981
877	12949	high	0.0781563126252505	-25.8319730512821
878	12949	intermediate	0.114068441064639	-31.1299056833333
879	12949	low	0.590361445783133	-72.8161764367347
880	12950	high	0	0
881	12950	intermediate	0.00527704485488127	-8.252313
882	12950	low	0.266536964980545	-28.4731621817518
883	12960	high	0	0
884	12960	intermediate	0.027190332326284	-7.91043633333333
885	12960	low	0.342657342657343	-62.0807923566327
886	12980	high	0.0163934426229508	-24.659225675
887	12980	intermediate	0.0287162162162162	-24.2621190411765
888	12980	low	0.419444444444444	-56.1944508238411
889	12991	high	0	0
890	12991	intermediate	0.00831024930747922	-4.37879973333333
891	12991	low	0.295454545454545	-35.0439112730769
892	12992	high	0	0
893	12992	intermediate	0.00289017341040462	-2.813947
894	12992	low	0.266416510318949	-36.0810388387324
895	12993	high	0	0
896	12993	intermediate	0.0194444444444444	-7.88484835714286
897	12993	low	0.276391554702495	-37.9003728395833
898	12994	high	0.00746268656716418	-41.53186
899	12994	intermediate	0.00649350649350649	-19.8523833
900	12994	low	0.303691275167785	-47.9857873381215
901	12995	high	0	0
902	12995	intermediate	0.0146627565982405	-5.9648755
903	12995	low	0.229755178907721	-42.3729405983607
904	12996	high	0.00630252100840336	-57.7553357333333
905	12996	intermediate	0.0119402985074627	-67.190242375
906	12996	low	0.370429252782194	-59.878196767382
907	12998	high	0	0
908	12998	intermediate	0.0185758513931889	-4.22632888333333
909	12998	low	0.194085027726433	-49.0599963990476
910	12999	high	0	0
911	12999	intermediate	0.0135135135135135	-7.195629725
912	12999	low	0.163339382940109	-53.8624743022222
913	13121	high	0	0
914	13121	intermediate	0.027190332326284	-12.2137524511111
915	13121	low	0.0238095238095238	-23.0271901666667
916	13122	high	0.0157657657657658	-20.2603922285714
917	13122	intermediate	0.0769230769230769	-15.8882170090909
918	13122	low	0.441037735849057	-59.0911659048128
919	13123	high	0.00728597449908925	-11.214379275
920	13123	intermediate	0.0453563714902808	-10.2920524352381
921	13123	low	0.0303738317757009	-14.6709158538462
922	13124	high	0.00389863547758285	-19.623298
923	13124	intermediate	0.0647887323943662	-24.2332829391304
924	13124	low	0.23951048951049	-76.8432171605839
925	13125	high	0	0
926	13125	intermediate	0.0412371134020619	-11.33587314375
927	13125	low	0.0331384015594542	-18.3817575294118
928	13126	high	0	0
929	13126	intermediate	0.0738636363636364	-16.8728163641026
930	13126	low	0.265765765765766	-71.9757764813559
931	13128	high	0	0
932	13128	intermediate	0.0340681362725451	-16.8829419705882
933	13128	low	0.202197802197802	-71.3991660771739
934	13129	high	0	0
935	13129	intermediate	0.00568181818181818	-10.3385122333333
936	13129	low	0.0410557184750733	-12.8250118428571
937	13131	high	0.00719424460431655	-32.3519266666667
938	13131	intermediate	0.00899280575539568	-45.587578
939	13131	low	0.314775160599572	-88.471556462585
940	13132	high	0.00213219616204691	-5.719336
941	13132	intermediate	0.0230326295585413	-11.803838
942	13132	low	0.12	-28.9925993518519
943	13133	high	0.00230414746543779	-2.0047081
944	13133	intermediate	0.0249520153550864	-17.7495797615385
945	13133	low	0.28659793814433	-74.3461962014388
946	13134	high	0.00223713646532438	-14.8359122
947	13134	intermediate	0.0390946502057613	-18.2414738736842
948	13134	low	0.297830374753452	-79.5791859470199
949	13135	high	0.00218818380743982	-7.8349615
950	13135	intermediate	0.0532786885245902	-20.1707044115385
951	13135	low	0.307070707070707	-72.4351203256579
952	13136	high	0	0
953	13136	intermediate	0.0227670753064799	-22.0254171846154
954	13136	low	0.190930787589499	-54.03131578125
955	13137	high	0	0
956	13137	intermediate	0.027027027027027	-21.0301262666667
957	13137	low	0.204761904761905	-51.3880265360465
958	13138	high	0	0
959	13138	intermediate	0.0232018561484919	-13.1905851
960	13138	low	0.227941176470588	-48.8233670064516
961	13139	high	0	0
962	13139	intermediate	0.0183246073298429	-19.06733691
963	13139	low	0.219298245614035	-47.4630178823
964	13140	high	0	0
965	13140	intermediate	0.0234986945169713	-9.06691073333333
966	13140	low	0.190243902439024	-49.2055452153846
967	13150	high	0	0
968	13150	intermediate	0.0166204986149584	-14.0348017
969	13150	low	0.268101761252446	-31.2810977708029
970	13160	high	0.00342465753424658	-3.3239433
971	13160	intermediate	0.0413385826771654	-19.3203346285714
972	13160	low	0.169540229885057	-28.2301808694915
973	13170	high	0.0137931034482759	-8.95953896666667
974	13170	intermediate	0.0522522522522523	-17.4635516413793
975	13170	low	0.22	-66.1567344848485
976	13181	high	0	0
977	13181	intermediate	0	0
978	13181	low	0.0296610169491525	-68.5233095142857
979	13182	high	0	0
980	13182	intermediate	0.00495049504950495	-25.07300435
981	13182	low	0.158024691358025	-25.0369202578125
982	13183	high	0	0
983	13183	intermediate	0	0
984	13183	low	0.0802603036876356	-42.2237525278378
985	13184	high	0	0
986	13184	intermediate	0	0
987	13184	low	0.227598566308244	-49.0721989370079
988	13185	high	0	0
989	13185	intermediate	0.0104166666666667	-13.914854
990	13185	low	0.207939508506616	-69.5048817990909
991	13186	high	0	0
992	13186	intermediate	0	0
993	13186	low	0.0990338164251208	-59.6182185365854
994	13187	high	0	0
995	13187	intermediate	0	0
996	13187	low	0.0825147347740668	-67.2234030571429
997	13188	high	0	0
998	13188	intermediate	0	0
999	13188	low	0.182555780933063	-73.1891706
1000	13189	high	0	0
1001	13189	intermediate	0	0
1002	13189	low	0.27536231884058	-49.5644469828947
1003	13190	high	0	0
1004	13190	intermediate	0.0393700787401575	-16.9971680666667
1005	13190	low	0.214452214452214	-23.659167823913
1006	13211	high	0	0
1007	13211	intermediate	0	0
1008	13211	low	0	0
1009	13212	high	0.00159489633173844	-4.644016
1010	13212	intermediate	0.020460358056266	-28.127718625
1011	13212	low	0.222748815165877	-34.7626868085106
1012	13213	high	0	0
1013	13213	intermediate	0	0
1014	13213	low	0	0
1015	13214	high	0	0
1016	13214	intermediate	0.0136518771331058	-11.511995075
1017	13214	low	0.14957264957265	-27.6985880557143
1018	13215	high	0	0
1019	13215	intermediate	0	0
1020	13215	low	0	0
1021	13216	high	0	0
1022	13216	intermediate	0.00280112044817927	-0.5012725
1023	13216	low	0.233576642335766	-40.0236928552083
1024	13217	high	0	0
1025	13217	intermediate	0	0
1026	13217	low	0	0
1027	13218	high	0	0
1028	13218	intermediate	0.00239234449760766	-10.4871762
1029	13218	low	0.363095238095238	-38.8234015622951
1030	13219	high	0	0
1031	13219	intermediate	0	0
1032	13219	low	0	0
1033	13221	high	0	0
1034	13221	intermediate	0	0
1035	13221	low	0.140401146131805	-32.7524467755102
1036	13222	high	0	0
1037	13222	intermediate	0.011605415860735	-17.8927126666667
1038	13222	low	0.12	-41.5499247916667
1039	13223	high	0	0
1040	13223	intermediate	0	0
1041	13223	low	0.14321608040201	-33.1324228368421
1042	13224	high	0	0
1043	13224	intermediate	0.00274725274725275	-3.5164688
1044	13224	low	0.272959183673469	-30.3657740719626
1045	13225	high	0	0
1046	13225	intermediate	0	0
1047	13225	low	0.169902912621359	-32.0329758314286
1048	13226	high	0	0
1049	13226	intermediate	0	0
1050	13226	low	0.101149425287356	-26.8888991636364
1051	13227	high	0	0
1052	13227	intermediate	0	0
1053	13227	low	0.145785876993166	-28.14470509375
1054	13228	high	0	0
1055	13228	intermediate	0	0
1056	13228	low	0.166301969365427	-29.8787658157895
1057	13229	high	0	0
1058	13229	intermediate	0	0
1059	13229	low	0.260606060606061	-31.9181881007752
1060	13230	high	0	0
1061	13230	intermediate	0	0
1062	13230	low	NA	NA
1063	13241	high	0	0
1064	13241	intermediate	0	0
1065	13241	low	NA	NA
1066	13242	high	0	0
1067	13242	intermediate	0.00804289544235925	-7.05187373333333
1068	13242	low	0.0193548387096774	-20.1610933333333
1069	13244	high	0	0
1070	13244	intermediate	0	0
1071	13244	low	0.0271493212669683	-19.3928081666667
1072	13245	high	0	0
1073	13245	intermediate	0.00395256916996047	-4.75069766666667
1074	13245	low	0.0174418604651163	-21.48823
1075	13246	high	0	0
1076	13246	intermediate	0	0
1077	13246	low	0.0308641975308642	-26.8467034
1078	13247	high	0	0
1079	13247	intermediate	0	0
1080	13247	low	0	0
1081	13248	high	0	0
1082	13248	intermediate	0	0
1083	13248	low	0.0180722891566265	-30.439417
1084	13249	high	0	0
1085	13249	intermediate	0	0
1086	13249	low	0	0
1087	13250	high	0	0
1088	13250	intermediate	0	0
1089	13250	low	NA	NA
1090	13261	high	0	0
1091	13261	intermediate	0.0129496402877698	-9.28972098888889
1092	13261	low	0	0
1093	13262	high	0	0
1094	13262	intermediate	0.00545454545454545	-4.93522956666667
1095	13262	low	0.077639751552795	-27.631900144
1096	13263	high	0	0
1097	13263	intermediate	0	0
1098	13263	low	0.0456273764258555	-33.7955396666667
1099	13264	high	0	0
1100	13264	intermediate	0	0
1101	13264	low	0.0161725067385445	-48.47102045
1102	13265	high	0	0
1103	13265	intermediate	0	0
1104	13265	low	0.0549450549450549	-32.0266716666667
1105	13266	high	0	0
1106	13266	intermediate	0	0
1107	13266	low	0.0171919770773639	-50.1304333333333
1108	13267	high	0	0
1109	13267	intermediate	0	0
1110	13267	low	0.0323741007194245	-27.5663947777778
1111	13268	high	0	0
1112	13268	intermediate	0	0
1113	13268	low	0.0103806228373702	-11.7230116666667
1114	13269	high	0	0
1115	13269	intermediate	0	0
1116	13269	low	0.0330882352941176	-21.7226095111111
1117	13272	high	0	0
1118	13272	intermediate	0	0
1119	13272	low	0	0
1120	13273	high	0	0
1121	13273	intermediate	0.0129682997118156	-6.446707
1122	13273	low	0	0
1123	13274	high	0	0
1124	13274	intermediate	0.0084985835694051	-21.3165333333333
1125	13274	low	0	0
1126	13275	high	0	0
1127	13275	intermediate	0.00870827285921625	-9.9715
1128	13275	low	0	0
1129	13276	high	0	0
1130	13276	intermediate	0	0
1131	13276	low	0	0
1132	13277	high	0	0
1133	13277	intermediate	0.00401069518716578	-15.8913456666667
1134	13277	low	0.0377358490566038	-48.41095925
1135	13278	high	0	0
1136	13278	intermediate	0	0
1137	13278	low	0.0434782608695652	-26.6405585555556
1138	13279	high	0	0
1139	13279	intermediate	0	0
1140	13279	low	0.0407239819004525	-25.9745044444444
1141	13281	high	0.00455927051671732	-50.2777983
1142	13281	intermediate	0.04	-32.80848099
1143	13281	low	0.0958646616541353	-13.6865500627451
1144	13282	high	0.00162337662337662	-9.628738
1145	13282	intermediate	0.0164609053497942	-13.8324276
1146	13282	low	0.347676419965577	-50.4457656217822
1147	13283	high	0.00473186119873817	-51.6087689
1148	13283	intermediate	0.0218181818181818	-61.0764177666667
1149	13283	low	0.0922787193973635	-22.5570329428571
1150	13284	high	0	0
1151	13284	intermediate	0.00193423597678917	-3.426634
1152	13284	low	0.0136612021857923	-13.61653
1153	13285	high	0	0
1154	13285	intermediate	0	0
1155	13285	low	0.0626959247648903	-16.27644115
1156	13286	high	0	0
1157	13286	intermediate	0	0
1158	13286	low	0.028391167192429	-3.77920746111111
1159	13287	high	0	0
1160	13287	intermediate	0	0
1161	13287	low	0.0424242424242424	-38.7919966428571
1162	13288	high	0	0
1163	13288	intermediate	0.00988142292490119	-6.97199914
1164	13288	low	0.055363321799308	-40.984147625
1165	13289	high	0	0
1166	13289	intermediate	0	0
1167	13289	low	0.0414201183431953	-37.6272945
1168	13291	high	0	0
1169	13291	intermediate	0	0
1170	13291	low	0.0855855855855856	-5.67882937368421
1171	13292	high	0	0
1172	13292	intermediate	0	0
1173	13292	low	0.254083484573503	-42.0407180454286
1174	13293	high	0	0
1175	13293	intermediate	0	0
1176	13293	low	0.169565217391304	-24.4300624307692
1177	13294	high	0	0
1178	13294	intermediate	0	0
1179	13294	low	0.178649237472767	-22.2066002109756
1180	13295	high	0	0
1181	13295	intermediate	0	0
1182	13295	low	0.127388535031847	-10.77016659
1183	13296	high	0	0
1184	13296	intermediate	0.0112359550561798	-7.49872525
1185	13296	low	0.145491803278689	-6.53078666478873
1186	13297	high	0	0
1187	13297	intermediate	0.0117994100294985	-8.27113472
1188	13297	low	0.164510166358595	-5.66051569325843
1189	13298	high	0	0
1190	13298	intermediate	0.00297619047619048	-7.676638
1191	13298	low	0.142322097378277	-3.83542997855263
1192	13299	high	0	0
1193	13299	intermediate	0	0
1194	13299	low	0.201492537313433	-15.2984585685185
1195	13310	high	0.00146412884333821	-7.117391
1196	13310	intermediate	0.058659217877095	-15.5254823761905
1197	13310	low	0.338345864661654	-42.0091645385185
1198	13320	high	0	0
1199	13320	intermediate	0.00377358490566038	-3.206678
1200	13320	low	0.0266990291262136	-32.3393929090909
1201	13330	high	0	0
1202	13330	intermediate	0	0
1203	13330	low	0	0
1204	13341	high	0	0
1205	13341	intermediate	0	0
1206	13341	low	0	0
1207	13342	high	0	0
1208	13342	intermediate	0	0
1209	13342	low	0.0068649885583524	-31.8915766666667
1210	13343	high	0	0
1211	13343	intermediate	0	0
1212	13343	low	0	0
1213	13344	high	0	0
1214	13344	intermediate	0	0
1215	13344	low	0	0
1216	13345	high	0	0
1217	13345	intermediate	0	0
1218	13345	low	0	0
1219	13346	high	0	0
1220	13346	intermediate	0	0
1221	13346	low	0	0
1222	13347	high	0	0
1223	13347	intermediate	0	0
1224	13347	low	0	0
1225	13348	high	0	0
1226	13348	intermediate	0	0
1227	13348	low	0	0
1228	13349	high	0	0
1229	13349	intermediate	0	0
1230	13349	low	0	0
1231	13351	high	0	0
1232	13351	intermediate	0	0
1233	13351	low	0	0
1234	13352	high	0	0
1235	13352	intermediate	0	0
1236	13352	low	0	0
1237	13353	high	0	0
1238	13353	intermediate	0	0
1239	13353	low	0.0101010101010101	-7.25836866666667
1240	13354	high	0	0
1241	13354	intermediate	0	0
1242	13354	low	0	0
1243	13355	high	0	0
1244	13355	intermediate	0	0
1245	13355	low	0	0
1246	13356	high	0	0
1247	13356	intermediate	0	0
1248	13356	low	0	0
1249	13357	high	0	0
1250	13357	intermediate	0.00923076923076923	-2.23248956833333
1251	13357	low	0.0401606425702811	-17.086086181
1252	13358	high	0	0
1253	13358	intermediate	0	0
1254	13358	low	0	0
1255	13361	high	0	0
1256	13361	intermediate	0	0
1257	13361	low	0	0
1258	13362	high	0	0
1259	13362	intermediate	0	0
1260	13362	low	0.00840336134453781	-7.04348084
1261	13363	high	0	0
1262	13363	intermediate	0	0
1263	13363	low	0	0
1264	13364	high	0	0
1265	13364	intermediate	0	0
1266	13364	low	0.0752475247524752	-17.8979599992105
1267	13365	high	0	0
1268	13365	intermediate	0	0
1269	13365	low	0.0087719298245614	-9.21753186666667
1270	13366	high	0	0
1271	13366	intermediate	0	0
1272	13366	low	0.0588235294117647	-41.7026586153846
1273	13368	high	0	0
1274	13368	intermediate	0	0
1275	13368	low	0.185589519650655	-53.2864098941176
1276	13369	high	0	0
1277	13369	intermediate	0	0
1278	13369	low	0.114967462039046	-40.4712448358491
1279	13370	high	0	0
1280	13370	intermediate	0	0
1281	13370	low	0	0
1282	13380	high	0	0
1283	13380	intermediate	0.00253807106598985	-1.408381
1284	13380	low	0.0665137614678899	-23.5259393793103
1285	13390	high	0	0
1286	13390	intermediate	0	0
1287	13390	low	0.0503597122302158	-30.1205729571429
1288	13400	high	0	0
1289	13400	intermediate	0	0
1290	13400	low	0.0716911764705882	-18.6348699051282
1291	14100	high	0	0
1292	14100	intermediate	0.0277264325323475	-3.156234716
1293	14100	low	0.0428571428571429	-24.0168242666667
1294	14210	high	0	0
1295	14210	intermediate	0	0
1296	14210	low	0.0263929618768328	-31.7730793333333
1297	14221	high	0	0
1298	14221	intermediate	0.00625	-2.76974356666667
1299	14221	low	0.0841121495327103	-29.9773438055556
1300	14222	high	0	0
1301	14222	intermediate	0	0
1302	14222	low	0.0655021834061135	-33.74451341
1303	14223	high	0	0
1304	14223	intermediate	0.00595238095238095	-5.553884
1305	14223	low	0.0853080568720379	-25.7142865722222
1306	14224	high	0	0
1307	14224	intermediate	0	0
1308	14224	low	0.0814977973568282	-30.6396530594595
1309	14225	high	0	0
1310	14225	intermediate	0.0100755667506297	-32.760042025
1311	14225	low	0.327814569536424	-69.2086674868687
1312	14226	high	0	0
1313	14226	intermediate	0	0
1314	14226	low	0.142533936651584	-20.6886707301587
1315	14227	high	0	0
1316	14227	intermediate	0.00373134328358209	-3.265474
1317	14227	low	0.0761904761904762	-20.348709596875
1318	14228	high	0	0
1319	14228	intermediate	0	0
1320	14228	low	0.0475059382422803	-27.309693945
1321	14229	high	0.0112107623318386	-14.62418256
1322	14229	intermediate	0.049738219895288	-16.1996767210526
1323	14229	low	0.320261437908497	-50.3355368387755
1324	14232	high	0	0
1325	14232	intermediate	0	0
1326	14232	low	0.101587301587302	-13.5307293375
1327	14233	high	0	0
1328	14233	intermediate	0.0016750418760469	-2.3467197
1329	14233	low	0.126182965299685	-14.4623939475
1330	14234	high	0	0
1331	14234	intermediate	0.119047619047619	-9.67864412
1332	14234	low	0.443502824858757	-21.2060610853503
1333	14235	high	0	0
1334	14235	intermediate	0.00333333333333333	-10.21406445
1335	14235	low	0.16875	-14.8675170518519
1336	14236	high	0	0
1337	14236	intermediate	0.0021551724137931	-11.8698671
1338	14236	low	0.21123595505618	-42.9071380680851
1339	14237	high	0	0
1340	14237	intermediate	0.0113085621970921	-15.1729198142857
1341	14237	low	0.196319018404908	-19.23303514
1342	14238	high	0	0
1343	14238	intermediate	0.134297520661157	-5.53062384969231
1344	14238	low	0.281376518218623	-32.2101588980576
1345	14239	high	0	0
1346	14239	intermediate	0.0269299820466786	-11.44903532
1347	14239	low	0.268354430379747	-24.6927535169811
1348	14241	high	0.0056657223796034	-14.13231915
1349	14241	intermediate	0.229199372056515	-17.2298968986301
1350	14241	low	0.386666666666667	-22.5598625603448
1351	14242	high	0.00267379679144385	-8.143831
1352	14242	intermediate	0.297872340425532	-15.8468971755102
1353	14242	low	0.299019607843137	-24.2814934754098
1354	14243	high	0.00273224043715847	-43.317225
1355	14243	intermediate	0.284280936454849	-12.0235214235294
1356	14243	low	0.222689075630252	-30.5235178396226
1357	14244	high	0.00992555831265509	-21.07766675
1358	14244	intermediate	0.0613207547169811	-24.3000604076923
1359	14244	low	0.464926590538336	-67.2611376126316
1360	14245	high	0.010230179028133	-20.284364325
1361	14245	intermediate	0.101293103448276	-17.1713146468085
1362	14245	low	0.417094017094017	-30.1841822229508
1363	14246	high	0.0144230769230769	-25.5841973333333
1364	14246	intermediate	0.0388127853881279	-21.9822196311765
1365	14246	low	0.571672354948805	-55.1821792596716
1366	14248	high	0.00543478260869565	-28.43261175
1367	14248	intermediate	0.0633663366336634	-23.825055275
1368	14248	low	0.372134038800705	-30.6802618454976
1369	14249	high	0.00274725274725275	-32.2936251
1370	14249	intermediate	0.1168	-9.82517991232877
1371	14249	low	0.301552106430155	-36.8068570963235
1372	14252	high	0	0
1373	14252	intermediate	0.0020746887966805	-25.2776222
1374	14252	low	0.339928057553957	-37.9665160809524
1375	14253	high	0	0
1376	14253	intermediate	0.049469964664311	-11.2783371035714
1377	14253	low	0.40153452685422	-28.0015481764331
1378	14254	high	0.00540540540540541	-22.43742695
1379	14254	intermediate	0.219178082191781	-10.5351474145833
1380	14254	low	0.452784503631961	-52.2212462914438
1381	14256	high	0.00900900900900901	-14.13452721125
1382	14256	intermediate	0.207729468599034	-21.0387193329767
1383	14256	low	0.467353951890034	-26.8423029952574
1384	14258	high	0.00247524752475248	-17.5400593
1385	14258	intermediate	0.377574370709382	-18.5481682224242
1386	14258	low	0.417362270450751	-30.3826368864
1387	14259	high	0.00419287211740042	-6.00041825
1388	14259	intermediate	0.0542907180385289	-15.4219678193548
1389	14259	low	0.26530612244898	-24.8862202817308
1390	14261	high	0.00420168067226891	-18.037206
1391	14261	intermediate	0.0565371024734982	-15.77363325
1392	14261	low	0.489949748743719	-24.3731849276923
1393	14262	high	0.0404761904761905	-19.37327707
1394	14262	intermediate	0.296218487394958	-8.70300181971631
1395	14262	low	0.334558823529412	-45.6994729021978
1396	14263	high	0.016359918200409	-7.7302290875
1397	14263	intermediate	0.079885877318117	-10.4153369
1398	14263	low	0.26	-82.4297486153846
1399	14264	high	0.150900900900901	-19.2007138940298
1400	14264	intermediate	0.410018552875696	-24.4089855773756
1401	14264	low	0.590809628008753	-73.5182600407407
1402	14265	high	0.0707762557077626	-23.4998380870968
1403	14265	intermediate	0.205882352941176	-21.0536267012422
1404	14265	low	0.536363636363636	-83.4218279067797
1405	14266	high	0.0727699530516432	-12.478856993871
1406	14266	intermediate	0.231707317073171	-18.690766517193
1407	14266	low	0.373188405797101	-86.3787861139806
1408	14268	high	0.0445859872611465	-25.3512225095238
1409	14268	intermediate	0.127320954907162	-24.9678275177083
1410	14268	low	0.581395348837209	-83.208564272
1411	14269	high	0.00625	-13.3183243333333
1412	14269	intermediate	0.104683195592287	-24.6799718355263
1413	14269	low	0.551282051282051	-84.7787188449612
1414	14271	high	0.00212765957446809	-23.14850446
1415	14271	intermediate	0.0537634408602151	-15.664190234
1416	14271	low	0.5	-23.6474157288835
1417	14272	high	0	0
1418	14272	intermediate	0.116696588868941	-12.9153003323077
1419	14272	low	0.501945525291829	-48.8543468562016
1420	14273	high	0.0021505376344086	-5.2840351
1421	14273	intermediate	0.0541516245487365	-15.9419782133333
1422	14273	low	0.294536817102138	-26.1873602774194
1423	14274	high	0.00213675213675214	-4.132954
1424	14274	intermediate	0.0553571428571429	-15.3132880322581
1425	14274	low	0.298543689320388	-26.2804464235772
1426	14275	high	0.0021551724137931	-15.1625741
1427	14275	intermediate	0.063573883161512	-16.8186346802703
1428	14275	low	0.281725888324873	-23.5389092295495
1429	14276	high	0.00255754475703325	-9.621359
1430	14276	intermediate	0.0423728813559322	-7.23086533333333
1431	14276	low	0.539589442815249	-84.6277674836956
1432	14277	high	0	0
1433	14277	intermediate	0.00177935943060498	-3.801668
1434	14277	low	0.243626062322946	-24.1076408162791
1435	14278	high	0	0
1436	14278	intermediate	0.0022075055187638	-12.4134955
1437	14278	low	0.246406570841889	-25.6690459233333
1438	14279	high	0	0
1439	14279	intermediate	0.00201207243460765	-30.07704
1440	14279	low	0.216157205240175	-18.9632970548485
1441	14281	high	0	0
1442	14281	intermediate	0	0
1443	14281	low	0.305322128851541	-18.2193698081743
1444	14282	high	0.0145278450363196	-16.45868565
1445	14282	intermediate	0.141463414634146	-22.609389712069
1446	14282	low	0.529983792544571	-40.9970269816514
1447	14283	high	0	0
1448	14283	intermediate	0.0392491467576792	-19.1290735304348
1449	14283	low	0.296470588235294	-24.200222531746
1450	14284	high	0.0635294117647059	-84.2961769577778
1451	14284	intermediate	0.15041782729805	-31.8967132557407
1452	14284	low	0.597560975609756	-78.0950779139286
1453	14285	high	0	0
1454	14285	intermediate	0.00419287211740042	-15.59865175
1455	14285	low	0.190669371196755	-21.3170139489362
1456	14286	high	0.0196506550218341	-17.7435454555556
1457	14286	intermediate	0.0927835051546392	-18.0870358185185
1458	14286	low	0.585	-49.6778562405983
1459	14288	high	0	0
1460	14288	intermediate	0.0177935943060498	-4.195343399
1461	14288	low	0.279120879120879	-39.8303096730709
1462	14289	high	0	0
1463	14289	intermediate	0.00384615384615385	-17.5563402
1464	14289	low	0.238568588469185	-27.4379310608333
1465	14292	high	0	0
1466	14292	intermediate	0	0
1467	14292	low	0.255489021956088	-26.4552982890625
1468	14293	high	0	0
1469	14293	intermediate	0	0
1470	14293	low	0.230452674897119	-24.1780973392857
1471	14294	high	0.0265486725663717	-65.4861121111111
1472	14294	intermediate	0.0858369098712446	-24.825220089
1473	14294	low	0.518433179723502	-68.7754080077778
1474	14295	high	0	0
1475	14295	intermediate	0.00233100233100233	-8.2763601
1476	14295	low	0.175152749490835	-21.6509489837209
1477	14296	high	0	0
1478	14296	intermediate	0.00235294117647059	-16.43615
1479	14296	low	0.186311787072243	-29.9203201428571
1480	14297	high	0	0
1481	14297	intermediate	0.0441860465116279	-1.52827169263158
1482	14297	low	0.213250517598344	-38.609995743301
1483	14298	high	0	0
1484	14298	intermediate	0.00236406619385343	-1.24121
1485	14298	low	0.204081632653061	-30.279972658
1486	14299	high	0	0
1487	14299	intermediate	0.00256410256410256	-4.882688
1488	14299	low	0.299610894941634	-43.6036286279221
1489	14301	high	0	0
1490	14301	intermediate	0	0
1491	14301	low	0.0508474576271186	-19.7620621666667
1492	14302	high	0	0
1493	14302	intermediate	0.0050251256281407	-5.750535
1494	14302	low	0.0877551020408163	-23.3528680232558
1495	14303	high	0	0
1496	14303	intermediate	0	0
1497	14303	low	0.182572614107884	-23.1142481715909
1498	14304	high	0	0
1499	14304	intermediate	0.010230179028133	-3.68297075
1500	14304	low	0.288546255506608	-13.4597124404031
1501	14306	high	0	0
1502	14306	intermediate	0.0147874306839187	-9.588027125
1503	14306	low	0.181268882175227	-27.67588068
1504	14307	high	0.00511073253833049	-41.30352
1505	14307	intermediate	0.0406698564593301	-34.7720378882353
1506	14307	low	0.379310344827586	-39.8207173115152
1507	14308	high	0	0
1508	14308	intermediate	0.00404858299595142	-34.308251
1509	14308	low	0.276666666666667	-34.2537146385542
1510	14309	high	0	0
1511	14309	intermediate	0.0287769784172662	-8.74582085
1512	14309	low	0.403940886699507	-39.3119867597561
1513	14410	high	0	0
1514	14410	intermediate	0.0122850122850123	-13.1196011
1515	14410	low	0.644444444444444	-17.8548565172414
1516	14420	high	0	0
1517	14420	intermediate	0.0310457516339869	-8.63174415789474
1518	14420	low	0.191304347826087	-16.3262687515152
1519	14430	high	0	0
1520	14430	intermediate	0.0248344370860927	-9.98411793333333
1521	14430	low	0.238235294117647	-22.1939738740741
1522	14441	high	0.0188679245283019	-22.8560818625
1523	14441	intermediate	0.0856481481481482	-20.5579748108108
1524	14441	low	0.409246575342466	-35.4203760531381
1525	14442	high	0.0529531568228106	-34.9439573615385
1526	14442	intermediate	0.0712250712250712	-49.798327
1527	14442	low	0.448160535117057	-57.060420205597
1528	14443	high	0.0242130750605327	-26.4413842
1529	14443	intermediate	0.0815347721822542	-22.2681673058824
1530	14443	low	0.426229508196721	-36.8049795684615
1531	14444	high	0.0392670157068063	-58.485149442
1532	14444	intermediate	0.0365168539325843	-41.7596278430769
1533	14444	low	0.452991452991453	-48.6566552939623
1534	14446	high	0.0215311004784689	-17.7316035955556
1535	14446	intermediate	0.0673575129533679	-26.7796649107692
1536	14446	low	0.459119496855346	-43.2283895766438
1537	14447	high	0.0128865979381443	-20.2352512
1538	14447	intermediate	0.0954446854663774	-16.1861364568182
1539	14447	low	0.517766497461929	-44.6737553954248
1540	14448	high	0.0455840455840456	-23.311011491875
1541	14448	intermediate	0.11614730878187	-36.6178218012195
1542	14448	low	0.563858695652174	-56.7308921953976
1543	14449	high	0.00249376558603491	-12.08435591
1544	14449	intermediate	0.134545454545455	-22.0384025256757
1545	14449	low	0.562372188139059	-37.1880869881818
1546	14450	high	0	0
1547	14450	intermediate	0.0318257956448911	-9.64873053578947
1548	14450	low	0.291891891891892	-18.27311861
1549	14460	high	0	0
1550	14460	intermediate	0	0
1551	14460	low	0.311284046692607	-40.7886123236875
1552	14470	high	0.110328638497653	-48.0388197021277
1553	14470	intermediate	0.104790419161677	-51.3504673514286
1554	14470	low	0.502941176470588	-50.5263228078947
1555	14480	high	0.0739910313901345	-23.7729545757576
1556	14480	intermediate	0.210268948655257	-25.2716696627907
1557	14480	low	0.452991452991453	-66.8882103943396
1558	14490	high	0.0965092402464066	-52.6779068404255
1559	14490	intermediate	0.129901960784314	-47.5918272509434
1560	14490	low	0.64954128440367	-68.611396290678
1561	14510	high	0.0144	-12.74616
1562	14510	intermediate	0.168674698795181	-26.1937735940476
1563	14510	low	0.640378548895899	-55.5355206389163
1564	14520	high	0	0
1565	14520	intermediate	0.0446927374301676	-6.22649881
1566	14520	low	0.392739273927393	-30.9656255941176
1567	14530	high	0	0
1568	14530	intermediate	0	0
1569	14530	low	0	0
1570	14540	high	0	0
1571	14540	intermediate	0	0
1572	14540	low	0	0
1573	14550	high	0.0804597701149425	-39.4165555904762
1574	14550	intermediate	0.221441124780316	-46.5143737842857
1575	14550	low	0.553008595988539	-46.5744971078757
1576	14560	high	0	0
1577	14560	intermediate	0.00145348837209302	-4.140036
1578	14560	low	0.225490196078431	-21.8676535521739
1579	14571	high	0.0016366612111293	-2.60807
1580	14571	intermediate	0.0522022838499184	-14.188123403125
1581	14571	low	0.273148148148148	-18.9959564932203
1582	14572	high	0	0
1583	14572	intermediate	0.0500807754442649	-10.261766516129
1584	14572	low	0.18957345971564	-21.7673024335
1585	14573	high	0	0
1586	14573	intermediate	0.139072847682119	-7.80016446349206
1587	14573	low	0.498614958448753	-26.1377927122222
1588	14574	high	0	0
1589	14574	intermediate	0.0306122448979592	-2.57039495
1590	14574	low	0.148305084745763	-12.1792537857143
1591	14575	high	0	0
1592	14575	intermediate	0.0962025316455696	-3.92801097894737
1593	14575	low	0.162105263157895	-14.0026963896104
1594	14576	high	0	0
1595	14576	intermediate	0.0693069306930693	-2.58058590714286
1596	14576	low	0.149350649350649	-26.9191159797101
1597	14577	high	0	0
1598	14577	intermediate	0	0
1599	14577	low	0.10806697108067	-31.5865679366197
1600	14578	high	0	0
1601	14578	intermediate	0.023972602739726	-21.48747289
1602	14578	low	0.292929292929293	-25.3768993905419
1603	14579	high	0.00448430493273543	-22.6812694
1604	14579	intermediate	0.12289156626506	-20.1537766313725
1605	14579	low	0.48013816925734	-35.7150876791367
1606	14580	high	0.00235849056603774	-22.8303153
1607	14580	intermediate	0.0554089709762533	-12.932891352381
1608	14580	low	0.307692307692308	-20.422008102551
1609	14590	high	0.207650273224044	-29.1345628919737
1610	14590	intermediate	0.464788732394366	-34.6556794175379
1611	14590	low	0.306324110671937	-48.9563466063226
1612	14610	high	0.136363636363636	-31.2925288811594
1613	14610	intermediate	0.232289950576606	-36.8259735170213
1614	14610	low	0.180428134556575	-48.8915410559322
1615	14620	high	0.0893246187363834	-28.3842983392683
1616	14620	intermediate	0.224582701062215	-26.5285268662838
1617	14620	low	0.15527950310559	-32.7612182968
1618	14630	high	0.00448430493273543	-50.672246
1619	14630	intermediate	0.0154440154440154	-41.679723375
1620	14630	low	0.310924369747899	-71.9232428783784
1621	14631	high	0.0174672489082969	-15.2761625875
1622	14631	intermediate	0.147540983606557	-19.7362915606061
1623	14631	low	0.131832797427653	-23.8680406146341
1624	14632	high	0.00455580865603645	-11.71646745
1625	14632	intermediate	0.0856313497822932	-15.5688733559322
1626	14632	low	0.125	-23.9936755487179
1627	14633	high	0.00671140939597315	-11.715737
1628	14633	intermediate	0.0730253353204173	-10.912222231551
1629	14633	low	0.139751552795031	-26.0836322
1630	14634	high	0.0453257790368272	-17.69802173125
1631	14634	intermediate	0.198611111111111	-20.3091114384615
1632	14634	low	0.501362397820163	-36.3560342782609
1633	14635	high	0	0
1634	14635	intermediate	0.0787518573551263	-10.6016900962264
1635	14635	low	0.230994152046784	-23.2582559303797
1636	14636	high	0.0264550264550265	-20.7414696
1637	14636	intermediate	0.0851528384279476	-53.9403783589744
1638	14636	low	0.556291390728477	-65.7156038214286
1639	14637	high	0	0
1640	14637	intermediate	0.0666666666666667	-9.73220003333333
1641	14637	low	0.277456647398844	-25.374033725
1642	14638	high	0	0
1643	14638	intermediate	0.0571870170015456	-8.23508229648649
1644	14638	low	0.248633879781421	-23.8361857362637
1645	14640	high	0	0
1646	14640	intermediate	0.0335766423357664	-8.02978785782609
1647	14640	low	0.309815950920245	-22.2131217544554
1648	14650	high	0.11436170212766	-31.5385642883721
1649	14650	intermediate	0.287162162162162	-33.4736373870588
1650	14650	low	0.651041666666667	-59.6566737138
1651	14661	high	0	0
1652	14661	intermediate	0.00282087447108604	-13.684389
1653	14661	low	0.334375	-22.1174479981308
1654	14662	high	0.157407407407407	-34.9820160102941
1655	14662	intermediate	0.223201174743025	-31.4541425973684
1656	14662	low	0.645259938837921	-71.8373108109005
1657	14663	high	0.0343007915567282	-14.2437631
1658	14663	intermediate	0.211570247933884	-14.704613946875
1659	14663	low	0.585526315789474	-61.6842573921348
1660	14664	high	0.0548302872062663	-16.2701421904762
1661	14664	intermediate	0.568259385665529	-18.3253850867868
1662	14664	low	0.430997876857749	-55.5434913980296
1663	14665	high	0.0733695652173913	-18.3307283107407
1664	14665	intermediate	0.404522613065327	-24.8383791168944
1665	14665	low	0.583086053412463	-62.1969616984224
1666	14666	high	0.048469387755102	-27.9083393263158
1667	14666	intermediate	0.159322033898305	-17.4403096117021
1668	14666	low	0.524017467248908	-68.8805963329167
1669	14667	high	0.0329113924050633	-16.0571902769231
1670	14667	intermediate	0.224283305227656	-11.1020170909774
1671	14667	low	0.581858407079646	-61.5521504536122
1672	14668	high	0.0154867256637168	-17.7360590857143
1673	14668	intermediate	0.223880597014925	-11.1286014916667
1674	14668	low	0.54646017699115	-61.3678377489879
1675	14669	high	0.05249343832021	-26.00656652
1676	14669	intermediate	0.209621993127148	-20.3810720987705
1677	14669	low	0.49895178197065	-67.7797238639496
1678	14670	high	0	0
1679	14670	intermediate	0.067238912732475	-13.6661439234043
1680	14670	low	0.358306188925081	-24.5050226154545
1681	14680	high	0	0
1682	14680	intermediate	0.0456490727532097	-8.96414299375
1683	14680	low	0.462809917355372	-26.9568406446429
1684	14691	high	0	0
1685	14691	intermediate	0.0685714285714286	-13.35023099375
1686	14691	low	0.397350993377483	-21.9226016415
1687	14692	high	0	0
1688	14692	intermediate	0.147058823529412	-23.3777657633333
1689	14692	low	0.239057239057239	-25.6652731485915
1690	14693	high	0.0497737556561086	-28.8437930454545
1691	14693	intermediate	0.104918032786885	-29.2031697875
1692	14693	low	0.383838383838384	-47.8509850236842
1693	14694	high	0.126106194690265	-32.432903522807
1694	14694	intermediate	0.228125	-48.8557752657534
1695	14694	low	0.582335329341317	-65.9156294465296
1696	14695	high	0.0426008968609865	-28.4417381578947
1697	14695	intermediate	0.0855263157894737	-31.4890777
1698	14695	low	0.501449275362319	-59.2916221109827
1699	14696	high	0.0382882882882883	-27.8808472941176
1700	14696	intermediate	0.0819672131147541	-31.60441568
1701	14696	low	0.525325615050651	-59.1898949479339
1702	14697	high	0.0837696335078534	-33.26563585
1703	14697	intermediate	0.163323782234957	-24.5003057245614
1704	14697	low	0.6262341325811	-76.3394970002252
1705	14698	high	0.0867208672086721	-35.081750059375
1706	14698	intermediate	0.23841059602649	-19.12371857625
1707	14698	low	0.512353706111834	-77.5084960720558
1708	14699	high	0.0232558139534884	-23.6843671888889
1709	14699	intermediate	0.391752577319588	-16.9392588430246
1710	14699	low	0.45859872611465	-58.9909199685185
1711	15110	high	0.0144230769230769	-27.9565533816667
1712	15110	intermediate	0.0402802101576182	-20.4683330956522
1713	15110	low	0.452538631346578	-74.9760193043902
1714	15112	high	0.0766355140186916	-19.7198883902439
1715	15112	intermediate	0.140468227424749	-37.8898864559524
1716	15112	low	0.169381107491857	-28.6740273384615
1717	15113	high	0.0136674259681093	-20.1862448333333
1718	15113	intermediate	0.032015065913371	-30.6228327647059
1719	15113	low	0.476595744680851	-60.6764973616071
1720	15114	high	0.0045766590389016	-35.543987
1721	15114	intermediate	0.0227703984819734	-28.2087977833333
1722	15114	low	0.46218487394958	-59.8835751931818
1723	15115	high	0.00462962962962963	-25.630387
1724	15115	intermediate	0.0147058823529412	-21.8766027125
1725	15115	low	0.431034482758621	-59.4994662025
1726	15116	high	0.0148305084745763	-26.5723162485714
1727	15116	intermediate	0.0166112956810631	-58.295997442
1728	15116	low	0.248633879781421	-51.1806768930769
1729	15117	high	0.0125	-30.3415638333333
1730	15117	intermediate	0.0296540362438221	-28.2407471444444
1731	15117	low	0.246458923512748	-48.0099560229885
1732	15118	high	0.0103950103950104	-39.75119594
1733	15118	intermediate	0.0347682119205298	-17.8247709904762
1734	15118	low	0.236619718309859	-50.7844108738095
1735	15119	high	0.0121703853955375	-33.8982369333333
1736	15119	intermediate	0.0394736842105263	-19.6770007958333
1737	15119	low	0.342182890855457	-56.0757260646552
1738	15120	high	0.0101626016260163	-36.310175
1739	15120	intermediate	0.0419254658385093	-38.174757037037
1740	15120	low	0.414473684210526	-76.7795553968254
1741	15121	high	0.0135396518375242	-29.3702687142857
1742	15121	intermediate	0.0400667779632721	-34.0649624625
1743	15121	low	0.515432098765432	-67.2232611305389
1744	15122	high	0.0250965250965251	-30.8882956923077
1745	15122	intermediate	0.043010752688172	-33.1740980833333
1746	15122	low	0.604395604395604	-75.8516251727273
1747	15124	high	0.0566037735849057	-42.5092883296296
1748	15124	intermediate	0.125703564727955	-53.3572150089552
1749	15124	low	0.569767441860465	-79.1416765163265
1750	15125	high	0.0153846153846154	-26.14281575
1751	15125	intermediate	0.0542372881355932	-39.7186534834375
1752	15125	low	0.515151515151515	-57.4784466096471
1753	15126	high	0.0308285163776493	-22.57836328125
1754	15126	intermediate	0.075	-39.562909302381
1755	15126	low	0.481994459833795	-57.9165315591954
1756	15127	high	0.0174081237911025	-19.1844692777778
1757	15127	intermediate	0.052991452991453	-38.5976468064516
1758	15127	low	0.532544378698225	-58.5750560027778
1759	15129	high	0.0408163265306122	-33.673142465
1760	15129	intermediate	0.126654064272212	-35.6751477970149
1761	15129	low	0.617577197149644	-67.6440940196154
1762	15130	high	0.0447154471544715	-22.6161818190909
1763	15130	intermediate	0.255533199195171	-23.2020135912598
1764	15130	low	0.509977827050998	-59.2977541599565
1765	15140	high	0.0887372013651877	-31.4484418269231
1766	15140	intermediate	0.128695652173913	-39.6607842121622
1767	15140	low	0.512544802867383	-77.3283327006993
1768	15150	high	0.29126213592233	-54.1127478197333
1769	15150	intermediate	0.601895734597156	-41.298573552874
1770	15150	low	0.95427435387674	-91.1704707433958
1771	15160	high	0.247588424437299	-40.5174147720779
1772	15160	intermediate	0.492063492063492	-42.1857769830645
1773	15160	low	0.710191082802548	-71.8305508744395
1774	15170	high	0.024263431542461	-25.4540757857143
1775	15170	intermediate	0.0921052631578947	-27.956309244898
1776	15170	low	0.274924471299094	-58.929916043956
1777	15180	high	0.0457875457875458	-24.9872253028
1778	15180	intermediate	0.195652173913043	-30.65149993875
1779	15180	low	0.55893536121673	-47.6753381171769
1780	15190	high	0.010507880910683	-37.6795177166667
1781	15190	intermediate	0.0730769230769231	-39.1294575105263
1782	15190	low	0.566502463054187	-55.9245552901449
1783	15200	high	0.00925925925925926	-21.06809662
1784	15200	intermediate	0.0533596837944664	-12.8287005055556
1785	15200	low	0.629441624365482	-73.9870583491935
1786	15301	high	0.0220994475138122	-19.1140299083333
1787	15301	intermediate	0.092485549132948	-28.893164453125
1788	15301	low	0.658802177858439	-56.6779928327824
1789	15302	high	0.0414746543778802	-36.4613426666667
1790	15302	intermediate	0.192236598890943	-36.2156077115385
1791	15302	low	0.5	-80.7880241935484
1792	15303	high	0.0936395759717314	-40.4924787339623
1793	15303	intermediate	0.246696035242291	-42.3785521053571
1794	15303	low	0.635714285714286	-78.1483503284644
1795	15304	high	0.0269299820466786	-14.9596483133333
1796	15304	intermediate	0.184397163120567	-24.2172413641026
1797	15304	low	0.53695652173913	-76.1980493801619
1798	15305	high	0	0
1799	15305	intermediate	0.0353982300884956	-10.561904425
1800	15305	low	0.268867924528302	-29.1957723298246
1801	15306	high	0.0102040816326531	-12.50295635
1802	15306	intermediate	0.056379821958457	-14.2605548052632
1803	15306	low	0.65631067961165	-58.1846797653846
1804	15307	high	0.0292207792207792	-22.4608362222222
1805	15307	intermediate	0.383838383838384	-24.7608045089474
1806	15307	low	0.720364741641337	-62.897081949789
1807	15308	high	0.206451612903226	-42.5543331398437
1808	15308	intermediate	0.355056179775281	-45.5764046150633
1809	15308	low	0.850666666666667	-83.0820544423511
1810	15309	high	0.20096463022508	-35.0506150224
1811	15309	intermediate	0.263803680981595	-43.7978724333333
1812	15309	low	0.851063829787234	-81.5913275767857
1813	15410	high	0.0128676470588235	-36.5490928571429
1814	15410	intermediate	0.0477815699658703	-37.94192125
1815	15410	low	0.512903225806452	-64.2097187044025
1816	15421	high	0.0244821092278719	-41.1358706153846
1817	15421	intermediate	0.0819935691318328	-46.8713785686274
1818	15421	low	0.592334494773519	-79.5217473647059
1819	15422	high	0.0335305719921105	-30.9400671941176
1820	15422	intermediate	0.0738137082601054	-39.3710726380952
1821	15422	low	0.510989010989011	-64.4650749505376
1822	15423	high	0.00782778864970646	-37.0991775
1823	15423	intermediate	0.0743243243243243	-43.1836388409091
1824	15423	low	0.492581602373887	-63.2460525421687
1825	15424	high	0.0165441176470588	-32.3178856555556
1826	15424	intermediate	0.0402802101576182	-36.9313214130435
1827	15424	low	0.578461538461538	-61.4468941404255
1828	15425	high	0.015625	-29.495152
1829	15425	intermediate	0.0550918196994992	-32.0265282727273
1830	15425	low	0.559270516717325	-60.143398923913
1831	15426	high	0.0281995661605206	-49.5354941538462
1832	15426	intermediate	0.0425894378194208	-42.1583288
1833	15426	low	0.48469387755102	-80.2236530947368
1834	15430	high	0.0536332179930796	-23.0792542903226
1835	15430	intermediate	0.150621118012422	-35.7798259484536
1836	15430	low	0.660550458715596	-67.8307727222222
1837	15440	high	0.0432220039292731	-41.9503655409091
1838	15440	intermediate	0.0963636363636364	-50.684988990566
1839	15440	low	0.57742782152231	-66.9232373009091
1840	15451	high	0.0609037328094303	-31.917112483871
1841	15451	intermediate	0.0780952380952381	-35.6946136097561
1842	15451	low	0.509852216748768	-81.4338776811594
1843	15452	high	0.0120481927710843	-20.6680711428571
1844	15452	intermediate	0.08311345646438	-22.2965384126984
1845	15452	low	0.227722772277228	-37.3165532173913
1846	15453	high	0.0158102766798419	-42.93573352875
1847	15453	intermediate	0.0927152317880795	-17.9261983935714
1848	15453	low	0.357575757575758	-71.7810808432203
1849	15460	high	0.00460122699386503	-7.96853296666667
1850	15460	intermediate	0.0982142857142857	-15.7515382
1851	15460	low	0.275862068965517	-52.738855375
1852	15471	high	0	0
1853	15471	intermediate	0.0223367697594502	-28.6681921538462
1854	15471	low	0.273037542662116	-57.9073471625
1855	15472	high	0	0
1856	15472	intermediate	0.0304054054054054	-23.2647520438889
1857	15472	low	0.27208480565371	-53.8366662616883
1858	15473	high	0	0
1859	15473	intermediate	0.0456026058631922	-19.9599586257143
1860	15473	low	0.356862745098039	-51.5693499331868
1861	15474	high	0.00349040139616056	-2.1321069
1862	15474	intermediate	0.0428816466552316	-29.098696136
1863	15474	low	0.341549295774648	-52.8567405123711
1864	15475	high	0.00695652173913044	-15.38428675
1865	15475	intermediate	0.0444839857651246	-18.965032064
1866	15475	low	0.336633663366337	-61.9377333735294
1867	15476	high	0.0852390852390852	-57.7222781146342
1868	15476	intermediate	0.106598984771574	-60.0816220412698
1869	15476	low	0.576086956521739	-73.8954460584906
1870	15477	high	0.0328542094455852	-46.9059205625
1871	15477	intermediate	0.0678571428571429	-46.6786868157895
1872	15477	low	0.580152671755725	-77.296775377193
1873	15478	high	0.0490566037735849	-26.5821680076923
1874	15478	intermediate	0.0926517571884984	-41.9109469068965
1875	15478	low	0.535211267605634	-65.9897243842105
1876	15479	high	0.0110497237569061	-30.0774606166667
1877	15479	intermediate	0.0703812316715543	-36.9908212791667
1878	15479	low	0.437209302325581	-62.361689593617
1879	15481	high	0.0107692307692308	-15.4639669664286
1880	15481	intermediate	0.062407132243685	-15.6532804339048
1881	15481	low	0.222222222222222	-50.8402300730769
1882	15482	high	0.0137524557956778	-35.5790925
1883	15482	intermediate	0.0558882235528942	-31.9525035035714
1884	15482	low	0.602325581395349	-80.0982036776062
1885	15485	high	0	0
1886	15485	intermediate	0.0441595441595442	-15.9497313322581
1887	15485	low	0.366412213740458	-54.0410025416667
1888	15490	high	0.0235849056603774	-21.7681364
1889	15490	intermediate	0.124624624624625	-25.9642628746988
1890	15490	low	0.514492753623188	-55.2234705492958
1891	15511	high	0	0
1892	15511	intermediate	0.0264227642276423	-13.067621
1893	15511	low	0.366598778004073	-58.4132670555556
1894	15512	high	0.0136612021857923	-20.11137106
1895	15512	intermediate	0.496632996632997	-16.9724721125424
1896	15512	low	0.525	-56.4913341444444
1897	15513	high	0	0
1898	15513	intermediate	0.0152505446623094	-10.3982822014286
1899	15513	low	0.467248908296943	-69.7931085158411
1900	15514	high	0	0
1901	15514	intermediate	0.00747663551401869	-10.40127905
1902	15514	low	0.351288056206089	-58.6247711906667
1903	15515	high	0	0
1904	15515	intermediate	0.00189035916824197	-12.062145
1905	15515	low	0.326388888888889	-56.770419858156
1906	15516	high	0.0101419878296146	-13.20621844
1907	15516	intermediate	0.112436115843271	-23.2491883727273
1908	15516	low	0.177777777777778	-20.8717018046875
1909	15517	high	0.00737100737100737	-12.182993
1910	15517	intermediate	0.0347985347985348	-34.0258922105263
1911	15517	low	0.509240246406571	-65.023347483871
1912	15521	high	0.01171875	-14.27271955
1913	15521	intermediate	0.0563165905631659	-32.7601733810811
1914	15521	low	0.531365313653137	-61.1331884770833
1915	15522	high	0.0167714884696017	-21.0906182875
1916	15522	intermediate	0.0357142857142857	-26.1369170578947
1917	15522	low	0.5707656612529	-63.5738352536585
1918	15523	high	0.0185950413223141	-17.7679645777778
1919	15523	intermediate	0.0418250950570342	-26.6343430818182
1920	15523	low	0.56046511627907	-62.0641298958506
1921	15524	high	0.0387096774193548	-16.5425415277778
1922	15524	intermediate	0.0492424242424242	-32.8219506423077
1923	15524	low	0.530201342281879	-61.0841509552743
1924	15525	high	0.023454157782516	-15.5673113636364
1925	15525	intermediate	0.0334645669291339	-28.3053815882353
1926	15525	low	0.542116630669546	-67.363087
1927	15526	high	0.00203665987780041	-7.739645
1928	15526	intermediate	0.0140845070422535	-25.5920034125
1929	15526	low	0.414698162729659	-62.5768545221519
1930	15527	high	0.0635593220338983	-18.2050231466667
1931	15527	intermediate	0.215827338129496	-21.3585647416667
1932	15527	low	0.490291262135922	-69.5520264356436
1933	15528	high	0.00212765957446809	-20.925454
1934	15528	intermediate	0.00379506641366224	-9.3811735
1935	15528	low	0.232505643340858	-56.3916690970874
1936	15529	high	0.00201612903225806	-0.1100919
1937	15529	intermediate	0.00601202404809619	-16.9895734666667
1938	15529	low	0.339325842696629	-63.613794913245
1939	15531	high	0.0314465408805031	-47.2253034
1940	15531	intermediate	0.0601769911504425	-50.8223622352941
1941	15531	low	0.590452261306533	-69.4674642680851
1942	15532	high	0.0232558139534884	-48.1204045833333
1943	15532	intermediate	0.0738362760834671	-41.7756483043478
1944	15532	low	0.584717607973422	-72.5172660738636
1945	15533	high	0.0480167014613779	-40.8571829956522
1946	15533	intermediate	0.0666666666666667	-50.3354889820513
1947	15533	low	0.598404255319149	-71.3203258871111
1948	15534	high	0.0361702127659574	-39.8599364705882
1949	15534	intermediate	0.0734265734265734	-50.352541547619
1950	15534	low	0.630653266331658	-72.6069650996016
1951	15535	high	0.0393013100436681	-49.9412628888889
1952	15535	intermediate	0.0758620689655172	-50.6186242954545
1953	15535	low	0.63681592039801	-72.1327487460938
1954	15536	high	0.0232558139534884	-35.2309114166667
1955	15536	intermediate	0.0867507886435331	-41.5495781945455
1956	15536	low	0.751724137931034	-79.4524437266055
1957	15537	high	0.0573248407643312	-72.6264306625926
1958	15537	intermediate	0.0642023346303502	-55.1109774212121
1959	15537	low	0.824175824175824	-91.1232101433067
1960	15538	high	0.032319391634981	-35.6599409058824
1961	15538	intermediate	0.0951492537313433	-59.8876495490196
1962	15538	low	0.592592592592593	-77.1948505308036
1963	15539	high	0.0228215767634855	-57.7951654727273
1964	15539	intermediate	0.0621359223300971	-51.24155993125
1965	15539	low	0.735891647855531	-79.3731114984663
1966	15541	high	0.0519930675909879	-22.95755516
1967	15541	intermediate	0.0838815789473684	-39.6637524843137
1968	15541	low	0.63921568627451	-76.0219410595092
1969	15542	high	0.0479846449136276	-34.366379236
1970	15542	intermediate	0.0923824959481361	-48.0823981122807
1971	15542	low	0.639072847682119	-65.6627338005181
1972	15543	high	0.033195020746888	-60.38025264375
1973	15543	intermediate	0.0769230769230769	-52.2672411146341
1974	15543	low	0.715294117647059	-77.3656879171053
1975	15544	high	0.0802469135802469	-48.0583476897436
1976	15544	intermediate	0.110526315789474	-52.8059366857143
1977	15544	low	0.705729166666667	-76.7051210298893
1978	15545	high	0.0674846625766871	-44.3083591272727
1979	15545	intermediate	0.131907308377897	-56.7662237621622
1980	15545	low	0.725641025641026	-73.2403755628975
1981	15546	high	0.01953125	-36.67701421
1982	15546	intermediate	0.0670926517571885	-39.651092597619
1983	15546	low	0.400662251655629	-57.2693780942149
1984	15547	high	0.0461538461538462	-41.2503853666667
1985	15547	intermediate	0.0998363338788871	-42.1331269573771
1986	15547	low	0.705501618122977	-67.7870959977064
1987	15548	high	0.0967741935483871	-67.8366514791667
1988	15548	intermediate	0.116316639741519	-61.9576433611111
1989	15548	low	0.563076923076923	-83.8714070765027
1990	15551	high	0.0179372197309417	-48.519446375
1991	15551	intermediate	0.0375	-36.170663047619
1992	15551	low	0.338709677419355	-67.1650571972789
1993	15552	high	0.0341113105924596	-38.7992397894737
1994	15552	intermediate	0.136513157894737	-30.3335380578313
1995	15552	low	0.541818181818182	-71.2395480261745
1996	15553	high	0.0335305719921105	-20.7979771647059
1997	15553	intermediate	0.276157804459691	-20.2245459223602
1998	15553	low	0.417142857142857	-62.8666107869863
1999	15554	high	0.0218253968253968	-39.4101267272727
[truncated: 11,147 more rows]
