# Supplementary material for: Environmental flow envelopes: quantifying global, ecosystem–threatening streamflow alterations
Source: Copernicus journal article supplement (doi:10.5194/hess-2021-260), 2021-05-11
Supplement: Supplementary file 1 [file hess-2021-260-supplement-version3.zip › fig3_d_to_f_data.csv]

basin_id	season	frequency	severity
1	11101	high	0.114224137931034	520.713432075472
2	11101	intermediate	0.102857142857143	496.118672222222
3	11101	low	0	0
4	11102	high	0	0
5	11102	intermediate	0	0
6	11102	low	0	0
7	11103	high	0	0
8	11103	intermediate	0	0
9	11103	low	0	0
10	11104	high	0	0
11	11104	intermediate	0	0
12	11104	low	0	0
13	11105	high	0	0
14	11105	intermediate	0	0
15	11105	low	0	0
16	11106	high	0	0
17	11106	intermediate	0	0
18	11106	low	0	0
19	11107	high	0	0
20	11107	intermediate	0	0
21	11107	low	0	0
22	11108	high	0	0
23	11108	intermediate	0	0
24	11108	low	0	0
25	11109	high	0	0
26	11109	intermediate	0	0
27	11109	low	0	0
28	11201	high	0	0
29	11201	intermediate	0	0
30	11201	low	0	0
31	11202	high	0	0
32	11202	intermediate	0	0
33	11202	low	0	0
34	11204	high	0	0
35	11204	intermediate	0	0
36	11204	low	0	0
37	11205	high	0	0
38	11205	intermediate	0	0
39	11205	low	0	0
40	11206	high	0	0
41	11206	intermediate	0	0
42	11206	low	0	0
43	11207	high	0.0112359550561798	206.90904
44	11207	intermediate	0.00223713646532438	129.899
45	11207	low	0	0
46	11211	high	0	0
47	11211	intermediate	0	0
48	11211	low	0	0
49	11212	high	0	0
50	11212	intermediate	0	0
51	11212	low	0	0
52	11213	high	0	0
53	11213	intermediate	0	0
54	11213	low	0	0
55	11214	high	0	0
56	11214	intermediate	0	0
57	11214	low	0	0
58	11215	high	0	0
59	11215	intermediate	0	0
60	11215	low	0	0
61	11216	high	0	0
62	11216	intermediate	0	0
63	11216	low	0	0
64	11217	high	0	0
65	11217	intermediate	0	0
66	11217	low	0	0
67	11218	high	0	0
68	11218	intermediate	0	0
69	11218	low	0	0
70	11219	high	0	0
71	11219	intermediate	0	0
72	11219	low	0	0
73	11220	high	0	0
74	11220	intermediate	0	0
75	11220	low	0	0
76	11230	high	0	0
77	11230	intermediate	0	0
78	11230	low	0	0
79	11240	high	0	0
80	11240	intermediate	0	0
81	11240	low	0	0
82	11260	high	0	0
83	11260	intermediate	0	0
84	11260	low	0	0
85	11270	high	0	0
86	11270	intermediate	0	0
87	11270	low	0	0
88	11280	high	0	0
89	11280	intermediate	0	0
90	11280	low	0	0
91	11290	high	0	0
92	11290	intermediate	0	0
93	11290	low	0	0
94	11400	high	0	0
95	11400	intermediate	0.00161550888529887	134.1369
96	11400	low	0.0220385674931129	113.1149625
97	11421	high	0.00379506641366224	105.50495
98	11421	intermediate	0.00152671755725191	105.6155
99	11421	low	0	0
100	11422	high	0.0062111801242236	145.470633333333
101	11422	intermediate	0	0
102	11422	low	0	0
103	11424	high	0.00622406639004149	183.020833333333
104	11424	intermediate	0.02	110.094407692308
105	11424	low	0.012987012987013	119.26065
106	11425	high	0.00946969696969697	216.69086
107	11425	intermediate	0.00343053173241852	182.4632
108	11425	low	0.0182370820668693	111.510016666667
109	11426	high	0.00441501103752759	236.24545
110	11426	intermediate	0.00436681222707424	149.28755
111	11426	low	0.0113421550094518	113.600983333333
112	11427	high	0	0
113	11427	intermediate	0.0113821138211382	112.958742857143
114	11427	low	0.0153374233128834	118.52962
115	11428	high	0	0
116	11428	intermediate	0.00941915227629513	124.027133333333
117	11428	low	0.0150602409638554	116.8737
118	11429	high	0	0
119	11429	intermediate	0	0
120	11429	low	0	0
121	11441	high	0.00337837837837838	106.5568
122	11441	intermediate	0.00159489633173844	107.4898
123	11441	low	0	0
124	11442	high	0.010351966873706	181.83716
125	11442	intermediate	0.0026246719160105	137.208
126	11442	low	0	0
127	11443	high	0.0136986301369863	112.9714125
128	11443	intermediate	0.00343642611683849	101.84465
129	11443	low	0	0
130	11444	high	0	0
131	11444	intermediate	0	0
132	11444	low	0	0
133	11446	high	0	0
134	11446	intermediate	0	0
135	11446	low	0	0
136	11447	high	0	0
137	11447	intermediate	0	0
138	11447	low	0	0
139	11448	high	0	0
140	11448	intermediate	0	0
141	11448	low	0	0
142	11449	high	0	0
143	11449	intermediate	0	0
144	11449	low	0	0
145	11450	high	0	0
146	11450	intermediate	0	0
147	11450	low	0	0
148	11460	high	0	0
149	11460	intermediate	0	0
150	11460	low	0	0
151	11470	high	0	0
152	11470	intermediate	0	0
153	11470	low	0	0
154	11480	high	0	0
155	11480	intermediate	0	0
156	11480	low	0	0
157	11491	high	0	0
158	11491	intermediate	0	0
159	11491	low	0	0
160	11492	high	0.00417536534446764	152.93195
161	11492	intermediate	0.00463678516228748	121.317666666667
162	11492	low	0	0
163	11493	high	0	0
164	11493	intermediate	0	0
165	11493	low	0	0
166	11494	high	0	0
167	11494	intermediate	0	0
168	11494	low	0	0
169	11495	high	0	0
170	11495	intermediate	0	0
171	11495	low	0	0
172	11496	high	0	0
173	11496	intermediate	0	0
174	11496	low	0	0
175	11497	high	0	0
176	11497	intermediate	0	0
177	11497	low	0	0
178	11498	high	0	0
179	11498	intermediate	0	0
180	11498	low	0	0
181	11499	high	0	0
182	11499	intermediate	0	0
183	11499	low	0	0
184	11510	high	0	0
185	11510	intermediate	0	0
186	11510	low	0	0
187	11520	high	0	0
188	11520	intermediate	0	0
189	11520	low	0	0
190	11530	high	0	0
191	11530	intermediate	0	0
192	11530	low	0	0
193	11542	high	0.0235849056603774	123.17936
194	11542	intermediate	0.00179856115107914	114.1319
195	11542	low	0	0
196	11543	high	0	0
197	11543	intermediate	0	0
198	11543	low	0	0
199	11544	high	0	0
200	11544	intermediate	0	0
201	11544	low	0	0
202	11545	high	0	0
203	11545	intermediate	0	0
204	11545	low	0	0
205	11546	high	0	0
206	11546	intermediate	0	0
207	11546	low	0	0
208	11547	high	0	0
209	11547	intermediate	0	0
210	11547	low	0	0
211	11548	high	0	0
212	11548	intermediate	0	0
213	11548	low	0	0
214	11549	high	0	0
215	11549	intermediate	0	0
216	11549	low	0	0
217	11550	high	0.00837520938023451	290.92194
218	11550	intermediate	0.0101351351351351	135.162283333333
219	11550	low	0	0
220	11560	high	0.0147329650092081	134.014825
221	11560	intermediate	0.00594353640416048	108.581925
222	11560	low	0	0
223	11571	high	0	0
224	11571	intermediate	0.00483675937122128	110.569175
225	11571	low	0	0
226	11573	high	0	0
227	11573	intermediate	0	0
228	11573	low	0	0
229	11574	high	0.00639658848614072	112.023466666667
230	11574	intermediate	0	0
231	11574	low	0	0
232	11575	high	0	0
233	11575	intermediate	0	0
234	11575	low	0	0
235	11580	high	0	0
236	11580	intermediate	0	0
237	11580	low	0	0
238	11590	high	0	0
239	11590	intermediate	0.0168350168350168	110.351433333333
240	11590	low	0	0
241	11600	high	0.00183150183150183	116.3275
242	11600	intermediate	0	0
243	11600	low	0.00488997555012225	109.4357
244	11700	high	0	0
245	11700	intermediate	0	0
246	11700	low	0	0
247	11710	high	0	0
248	11710	intermediate	0.00834724540901502	125.18126
249	11710	low	0.0186666666666667	112.943485714286
250	11720	high	0	0
251	11720	intermediate	0	0
252	11720	low	0	0
253	11730	high	0	0
254	11730	intermediate	0	0
255	11730	low	0	0
256	11732	high	0	0
257	11732	intermediate	0.00168634064080944	102.873
258	11732	low	0.00617283950617284	105.3642
259	11733	high	0.00194931773879142	129.322
260	11733	intermediate	0.0128617363344051	120.581025
261	11733	low	0.039344262295082	117.454425
262	11734	high	0.0081799591002045	127.96455
263	11734	intermediate	0.0682128240109141	140.321198
264	11734	low	0.055045871559633	158.086058333333
265	11735	high	0	0
266	11735	intermediate	0	0
267	11735	low	0	0
268	11736	high	0	0
269	11736	intermediate	0	0
270	11736	low	0	0
271	11738	high	0	0
272	11738	intermediate	0	0
273	11738	low	0	0
274	11739	high	0	0
275	11739	intermediate	0.00232558139534884	101.0925
276	11739	low	0.0726872246696035	153.38096969697
277	11740	high	0	0
278	11740	intermediate	0	0
279	11740	low	0.00985221674876847	125.540825
280	11741	high	0	0
281	11741	intermediate	0.00226244343891403	101.9083
282	11741	low	0.0743243243243243	157.301257575758
283	11742	high	0	0
284	11742	intermediate	0	0
285	11742	low	0	0
286	11743	high	0	0
287	11743	intermediate	0.00227272727272727	105.2816
288	11743	low	0.0900900900900901	162.62142
289	11744	high	0	0
290	11744	intermediate	0	0
291	11744	low	0	0
292	11745	high	0.0203703703703704	130.1709
293	11745	intermediate	0.0958268933539413	140.222151612903
294	11745	low	0.339920948616601	339.445390697674
295	11746	high	0	0
296	11746	intermediate	0	0
297	11746	low	0	0
298	11747	high	0.0636215334420881	156.442938461538
299	11747	intermediate	0.083617747440273	149.570042857143
300	11747	low	0.477178423236515	741.015394782609
301	11748	high	0	0
302	11748	intermediate	0	0
303	11748	low	0.015	195.114733333333
304	11749	high	0	0
305	11749	intermediate	0	0
306	11749	low	0	0
307	11750	high	0	0
308	11750	intermediate	0	0
309	11750	low	0	0
310	11761	high	0	0
311	11761	intermediate	0	0
312	11761	low	0	0
313	11762	high	0	0
314	11762	intermediate	0	0
315	11762	low	0	0
316	11763	high	0	0
317	11763	intermediate	0	0
318	11763	low	0	0
319	11764	high	0	0
320	11764	intermediate	0	0
321	11764	low	0	0
322	11765	high	0	0
323	11765	intermediate	0	0
324	11765	low	0	0
325	11766	high	0	0
326	11766	intermediate	0	0
327	11766	low	0	0
328	11767	high	0	0
329	11767	intermediate	0	0
330	11767	low	0	0
331	11768	high	0	0
332	11768	intermediate	0	0
333	11768	low	0	0
334	11769	high	0	0
335	11769	intermediate	0	0
336	11769	low	0	0
337	11770	high	0	0
338	11770	intermediate	0	0
339	11770	low	0	0
340	11780	high	0	0
341	11780	intermediate	0	0
342	11780	low	0	0
343	11791	high	0	0
344	11791	intermediate	0	0
345	11791	low	0	0
346	11792	high	0	0
347	11792	intermediate	0	0
348	11792	low	0	0
349	11793	high	0	0
350	11793	intermediate	0	0
351	11793	low	0	0
352	11794	high	0	0
353	11794	intermediate	0	0
354	11794	low	0	0
355	11795	high	0	0
356	11795	intermediate	0	0
357	11795	low	0	0
358	11796	high	0	0
359	11796	intermediate	0	0
360	11796	low	0	0
361	11797	high	0	0
362	11797	intermediate	0	0
363	11797	low	0	0
364	11798	high	0	0
365	11798	intermediate	0	0
366	11798	low	0	0
367	12100	high	0	0
368	12100	intermediate	0.415789473684211	572.899893670886
369	12100	low	0.00671140939597315	134.4132
370	12210	high	0	0
371	12210	intermediate	0.422865013774105	560.530238762215
372	12210	low	0	0
373	12221	high	0	0
374	12221	intermediate	0	0
375	12221	low	0	0
376	12222	high	0	0
377	12222	intermediate	0	0
378	12222	low	0	0
379	12223	high	0	0
380	12223	intermediate	0	0
381	12223	low	0	0
382	12224	high	0	0
383	12224	intermediate	0	0
384	12224	low	0	0
385	12225	high	0	0
386	12225	intermediate	0	0
387	12225	low	0	0
388	12226	high	0	0
389	12226	intermediate	0	0
390	12226	low	0	0
391	12227	high	0	0
392	12227	intermediate	0	0
393	12227	low	0	0
394	12228	high	0	0
395	12228	intermediate	0	0
396	12228	low	0	0
397	12229	high	0	0
398	12229	intermediate	0	0
399	12229	low	0	0
400	12231	high	0.00364963503649635	130.4815
401	12231	intermediate	0.535075653370014	2027.85499974293
402	12231	low	0	0
403	12232	high	0	0
404	12232	intermediate	0	0
405	12232	low	0	0
406	12233	high	0.00732600732600733	130.281
407	12233	intermediate	0.538461538461538	1943.7833252551
408	12233	low	0	0
409	12234	high	0	0
410	12234	intermediate	0	0
411	12234	low	0	0
412	12235	high	0.0541012216404887	172.486622580645
413	12235	intermediate	0.545064377682403	3142.03702965879
414	12235	low	0	0
415	12236	high	0	0
416	12236	intermediate	0	0
417	12236	low	0	0
418	12237	high	0	0
419	12237	intermediate	0.39622641509434	4302.49716428571
420	12237	low	0	0
421	12238	high	0	0
422	12238	intermediate	0.114982578397213	9516.7911
423	12238	low	0.173611111111111	4869.70038
424	12241	high	0	0
425	12241	intermediate	0	0
426	12241	low	0.163779527559055	1739.44103942308
427	12242	high	0	0
428	12242	intermediate	0.00263852242744063	103.4651
429	12242	low	0.249185667752443	2256.38146535948
430	12243	high	0	0
431	12243	intermediate	0	0
432	12243	low	0.165615141955836	999.899617142857
433	12244	high	0	0
434	12244	intermediate	0	0
435	12244	low	0	0
436	12245	high	0	0
437	12245	intermediate	0	0
438	12245	low	0	0
439	12246	high	0	0
440	12246	intermediate	0	0
441	12246	low	0	0
442	12247	high	0	0
443	12247	intermediate	0	0
444	12247	low	0	0
445	12248	high	0	0
446	12248	intermediate	0	0
447	12248	low	0	0
448	12249	high	0	0
449	12249	intermediate	0	0
450	12249	low	0	0
451	12250	high	0.0036231884057971	108.7646
452	12250	intermediate	0.546961325966851	5077.41638383838
453	12250	low	0	0
454	12261	high	0.0074487895716946	123.5467
455	12261	intermediate	0.0402476780185759	122.177907692308
456	12261	low	0.112068965517241	660.871150769231
457	12262	high	0	0
458	12262	intermediate	0	0
459	12262	low	0	0
460	12263	high	0	0
461	12263	intermediate	0	0
462	12263	low	0	0
463	12264	high	0	0
464	12264	intermediate	0	0
465	12264	low	0	0
466	12265	high	0	0
467	12265	intermediate	0	0
468	12265	low	0	0
469	12266	high	0	0
470	12266	intermediate	0	0
471	12266	low	0	0
472	12267	high	0	0
473	12267	intermediate	0	0
474	12267	low	0	0
475	12268	high	0	0
476	12268	intermediate	0	0
477	12268	low	0	0
478	12269	high	0	0
479	12269	intermediate	0	0
480	12269	low	0	0
481	12271	high	0.209650582362729	9527.68444047619
482	12271	intermediate	0.473841554559043	8095.1850126183
483	12271	low	0	0
484	12272	high	0.225042301184433	10357.7686721805
485	12272	intermediate	0.373365041617122	8019.83377324841
486	12272	low	0	0
487	12273	high	0	0
488	12273	intermediate	0.0103092783505155	102.26772
489	12273	low	0	0
490	12274	high	0	0
491	12274	intermediate	0	0
492	12274	low	0	0
493	12275	high	0	0
494	12275	intermediate	0	0
495	12275	low	0	0
496	12276	high	0	0
497	12276	intermediate	0	0
498	12276	low	0	0
499	12277	high	0	0
500	12277	intermediate	0	0
501	12277	low	0	0
502	12278	high	0	0
503	12278	intermediate	0	0
504	12278	low	0	0
505	12279	high	0	0
506	12279	intermediate	0	0
507	12279	low	0	0
508	12281	high	0	0
509	12281	intermediate	0	0
510	12281	low	0	0
511	12282	high	0	0
512	12282	intermediate	0	0
513	12282	low	0	0
514	12283	high	0	0
515	12283	intermediate	0	0
516	12283	low	0	0
517	12284	high	0	0
518	12284	intermediate	0	0
519	12284	low	0	0
520	12285	high	0	0
521	12285	intermediate	0	0
522	12285	low	0	0
523	12286	high	0	0
524	12286	intermediate	0	0
525	12286	low	0	0
526	12287	high	0	0
527	12287	intermediate	0	0
528	12287	low	0	0
529	12288	high	0	0
530	12288	intermediate	0	0
531	12288	low	0	0
532	12289	high	0	0
533	12289	intermediate	0	0
534	12289	low	0	0
535	12291	high	0	0
536	12291	intermediate	0	0
537	12291	low	0	0
538	12292	high	0	0
539	12292	intermediate	0	0
540	12292	low	0	0
541	12293	high	0	0
542	12293	intermediate	0	0
543	12293	low	0	0
544	12294	high	0	0
545	12294	intermediate	0	0
546	12294	low	0	0
547	12295	high	0	0
548	12295	intermediate	0	0
549	12295	low	0	0
550	12296	high	0	0
551	12296	intermediate	0	0
552	12296	low	0	0
553	12297	high	0	0
554	12297	intermediate	0	0
555	12297	low	0	0
556	12298	high	0	0
557	12298	intermediate	0	0
558	12298	low	0	0
559	12299	high	0	0
560	12299	intermediate	0	0
561	12299	low	0	0
562	12301	high	0	0
563	12301	intermediate	0.43801652892562	596.797635220126
564	12301	low	0.00613496932515337	132.824
565	12302	high	0	0
566	12302	intermediate	0	0
567	12302	low	0	0
568	12303	high	0	0
569	12303	intermediate	0	0
570	12303	low	0	0
571	12304	high	0	0
572	12304	intermediate	0.0830670926517572	197.199769230769
573	12304	low	0.0892857142857143	204.063766666667
574	12305	high	0	0
575	12305	intermediate	0	0
576	12305	low	0	0
577	12306	high	0	0
578	12306	intermediate	0	0
579	12306	low	0	0
580	12307	high	0	0
581	12307	intermediate	0	0
582	12307	low	0	0
583	12308	high	0	0
584	12308	intermediate	0	0
585	12308	low	0	0
586	12309	high	0	0
587	12309	intermediate	0	0
588	12309	low	0	0
589	12410	high	0	0
590	12410	intermediate	0	0
591	12410	low	0	0
592	12420	high	0	0
593	12420	intermediate	0	0
594	12420	low	0	0
595	12430	high	0	0
596	12430	intermediate	0	0
597	12430	low	0	0
598	12440	high	0.0140845070422535	120.573877777778
599	12440	intermediate	0.0104895104895105	122.658066666667
600	12440	low	0.0611353711790393	173.9216
601	12450	high	0	0
602	12450	intermediate	0	0
603	12450	low	0	0
604	12460	high	0	0
605	12460	intermediate	0	0
606	12460	low	0	0
607	12470	high	0	0
608	12470	intermediate	0	0
609	12470	low	0	0
610	12480	high	0	0
611	12480	intermediate	0	0
612	12480	low	0	0
613	12492	high	0	0
614	12492	intermediate	0	0
615	12492	low	0	0
616	12493	high	0	0
617	12493	intermediate	0	0
618	12493	low	0	0
619	12494	high	0	0
620	12494	intermediate	0	0
621	12494	low	0	0
622	12495	high	0	0
623	12495	intermediate	0	0
624	12495	low	0	0
625	12496	high	0	0
626	12496	intermediate	0	0
627	12496	low	0	0
628	12498	high	0	0
629	12498	intermediate	0	0
630	12498	low	0	0
631	12499	high	0	0
632	12499	intermediate	0	0
633	12499	low	0	0
634	12510	high	0	0
635	12510	intermediate	0	0
636	12510	low	0	0
637	12520	high	0	0
638	12520	intermediate	0	0
639	12520	low	0	0
640	12530	high	0	0
641	12530	intermediate	0	0
642	12530	low	0	0
643	12540	high	0	0
644	12540	intermediate	0.03125	179.369366666667
645	12540	low	0	0
646	12551	high	0	0
647	12551	intermediate	0	0
648	12551	low	0	0
649	12552	high	0	0
650	12552	intermediate	0.0333889816360601	131.81477
651	12552	low	0.119298245614035	122.127691176471
652	12553	high	0	0
653	12553	intermediate	0	0
654	12553	low	0	0
655	12554	high	0	0
656	12554	intermediate	0	0
657	12554	low	0	0
658	12555	high	0	0
659	12555	intermediate	0	0
660	12555	low	0	0
661	12556	high	0	0
662	12556	intermediate	0	0
663	12556	low	0	0
664	12557	high	0	0
665	12557	intermediate	0	0
666	12557	low	0	0
667	12558	high	0	0
668	12558	intermediate	0	0
669	12558	low	0	0
670	12559	high	0	0
671	12559	intermediate	0	0
672	12559	low	0	0
673	12560	high	0	0
674	12560	intermediate	0	0
675	12560	low	0	0
676	12580	high	0	0
677	12580	intermediate	0	0
678	12580	low	0	0
679	12590	high	0	0
680	12590	intermediate	0	0
681	12590	low	0	0
682	12600	high	0	0
683	12600	intermediate	0	0
684	12600	low	0	0
685	12601	high	0	0
686	12601	intermediate	0	0
687	12601	low	0	0
688	12602	high	0	0
689	12602	intermediate	0	0
690	12602	low	0	0
691	12603	high	0	0
692	12603	intermediate	0	0
693	12603	low	0	0
694	12604	high	0	0
695	12604	intermediate	0	0
696	12604	low	0	0
697	12605	high	0	0
698	12605	intermediate	0	0
699	12605	low	0	0
700	12606	high	0	0
701	12606	intermediate	0	0
702	12606	low	0	0
703	12607	high	0	0
704	12607	intermediate	0	0
705	12607	low	0	0
706	12608	high	0	0
707	12608	intermediate	0	0
708	12608	low	0	0
709	12609	high	0	0
710	12609	intermediate	0	0
711	12609	low	0	0
712	12710	high	0	0
713	12710	intermediate	0	0
714	12710	low	0	0
715	12720	high	0.00216450216450216	110.2305
716	12720	intermediate	0.00493421052631579	119.645666666667
717	12720	low	0	0
718	12730	high	0	0
719	12730	intermediate	0	0
720	12730	low	0	0
721	12740	high	0	0
722	12740	intermediate	0	0
723	12740	low	0	0
724	12741	high	0	0
725	12741	intermediate	0	0
726	12741	low	0	0
727	12742	high	0	0
728	12742	intermediate	0	0
729	12742	low	0	0
730	12744	high	0	0
731	12744	intermediate	0	0
732	12744	low	0	0
733	12746	high	0	0
734	12746	intermediate	0	0
735	12746	low	0	0
736	12747	high	0.00592885375494071	157.4782
737	12747	intermediate	0.00174520069808028	121.957
738	12747	low	0.0166204986149584	338.600333333333
739	12748	high	0.0056390977443609	135.1657
740	12748	intermediate	0.00242718446601942	128.2954
741	12748	low	0.00201612903225806	261.282
742	12749	high	0	0
743	12749	intermediate	0	0
744	12749	low	0	0
745	12750	high	0.278461538461538	263.19644640884
746	12750	intermediate	0.0697115384615385	232.288244827586
747	12750	low	0.0053475935828877	118.0429
748	12760	high	0	0
749	12760	intermediate	0	0
750	12760	low	0	0
751	12770	high	0	0
752	12770	intermediate	0.00445103857566766	121.315833333333
753	12770	low	0	0
754	12780	high	0.0131386861313869	134.457955555556
755	12780	intermediate	0.0200573065902579	150.433007142857
756	12780	low	0	0
757	12792	high	0	0
758	12792	intermediate	0	0
759	12792	low	0	0
760	12793	high	0	0
761	12793	intermediate	0.00165837479270315	109.8657
762	12793	low	0.0274725274725275	244.4554
763	12794	high	0	0
764	12794	intermediate	0	0
765	12794	low	0	0
766	12795	high	0.00453172205438067	137.1097
767	12795	intermediate	0.0243111831442464	193.965486666667
768	12795	low	0.0186335403726708	363.043133333333
769	12796	high	0.00599700149925037	137.8641
770	12796	intermediate	0.0402476780185759	246.564392307692
771	12796	low	0	0
772	12797	high	0	0
773	12797	intermediate	0.0625	290.271285365854
774	12797	low	0	0
775	12798	high	0	0
776	12798	intermediate	0	0
777	12798	low	0	0
778	12799	high	0	0
779	12799	intermediate	0.0025706940874036	179.683
780	12799	low	0.00472813238770686	217.5936
781	12800	high	0	0
782	12800	intermediate	0	0
783	12800	low	0	0
784	12801	high	0	0
785	12801	intermediate	0	0
786	12801	low	0	0
787	12802	high	0	0
788	12802	intermediate	0	0
789	12802	low	0	0
790	12803	high	0	0
791	12803	intermediate	0	0
792	12803	low	0.236607142857143	922.988314150943
793	12804	high	0	0
794	12804	intermediate	0	0
795	12804	low	0.252252252252252	1448.00567767857
796	12805	high	0	0
797	12805	intermediate	0	0
798	12805	low	0	0
799	12806	high	0	0
800	12806	intermediate	0	0
801	12806	low	0	0
802	12808	high	0	0
803	12808	intermediate	0	0
804	12808	low	0	0
805	12809	high	0	0
806	12809	intermediate	0	0
807	12809	low	0	0
808	12902	high	0	0
809	12902	intermediate	0	0
810	12902	low	0	0
811	12904	high	0	0
812	12904	intermediate	0	0
813	12904	low	0	0
814	12906	high	0	0
815	12906	intermediate	0	0
816	12906	low	0.278801843317972	1980.99720909091
817	12908	high	0	0
818	12908	intermediate	0	0
819	12908	low	0	0
820	12909	high	0	0
821	12909	intermediate	0	0
822	12909	low	0	0
823	12910	high	0	0
824	12910	intermediate	0	0
825	12910	low	0	0
826	12921	high	0.00551470588235294	123.322433333333
827	12921	intermediate	0.00186567164179104	119.5259
828	12921	low	0	0
829	12922	high	0.003690036900369	138.22685
830	12922	intermediate	0.00176056338028169	119.0577
831	12922	low	0	0
832	12923	high	0	0
833	12923	intermediate	0	0
834	12923	low	0	0
835	12924	high	0.0072463768115942	223.456025
836	12924	intermediate	0	0
837	12924	low	0.00253164556962025	281.8431
838	12925	high	0	0
839	12925	intermediate	0	0
840	12925	low	0	0
841	12927	high	0	0
842	12927	intermediate	0	0
843	12927	low	0	0
844	12928	high	0	0
845	12928	intermediate	0	0
846	12928	low	0	0
847	12929	high	0.0019723865877712	106.3222
848	12929	intermediate	0.00178571428571429	109.1166
849	12929	low	0.00268096514745308	110.0427
850	12930	high	0	0
851	12930	intermediate	0	0
852	12930	low	0	0
853	12940	high	0	0
854	12940	intermediate	0	0
855	12940	low	0	0
856	12941	high	0	0
857	12941	intermediate	0	0
858	12941	low	0	0
859	12942	high	0	0
860	12942	intermediate	0	0
861	12942	low	0	0
862	12943	high	0	0
863	12943	intermediate	0	0
864	12943	low	0	0
865	12944	high	0	0
866	12944	intermediate	0	0
867	12944	low	0	0
868	12946	high	0	0
869	12946	intermediate	0	0
870	12946	low	0	0
871	12947	high	0	0
872	12947	intermediate	0	0
873	12947	low	0	0
874	12948	high	0	0
875	12948	intermediate	0	0
876	12948	low	0	0
877	12949	high	0	0
878	12949	intermediate	0	0
879	12949	low	0	0
880	12950	high	0	0
881	12950	intermediate	0	0
882	12950	low	0	0
883	12960	high	0.0037243947858473	120.4197
884	12960	intermediate	0	0
885	12960	low	0.00174825174825175	101.2969
886	12980	high	0	0
887	12980	intermediate	0	0
888	12980	low	0	0
889	12991	high	0	0
890	12991	intermediate	0	0
891	12991	low	0	0
892	12992	high	0	0
893	12992	intermediate	0	0
894	12992	low	0	0
895	12993	high	0	0
896	12993	intermediate	0	0
897	12993	low	0	0
898	12994	high	0	0
899	12994	intermediate	0	0
900	12994	low	0	0
901	12995	high	0	0
902	12995	intermediate	0	0
903	12995	low	0	0
904	12996	high	0.00630252100840336	110.0192
905	12996	intermediate	0	0
906	12996	low	0	0
907	12998	high	0	0
908	12998	intermediate	0	0
909	12998	low	0	0
910	12999	high	0	0
911	12999	intermediate	0	0
912	12999	low	0	0
913	13121	high	0	0
914	13121	intermediate	0.0105740181268882	107.464585714286
915	13121	low	0.476190476190476	4457.45467083333
916	13122	high	0	0
917	13122	intermediate	0	0
918	13122	low	0	0
919	13123	high	0	0
920	13123	intermediate	0.00215982721382289	113.1345
921	13123	low	0.280373831775701	1670.44378583333
922	13124	high	0	0
923	13124	intermediate	0	0
924	13124	low	0	0
925	13125	high	0	0
926	13125	intermediate	0.00257731958762887	115.477
927	13125	low	0.233918128654971	1286.9700425
928	13126	high	0	0
929	13126	intermediate	0	0
930	13126	low	0	0
931	13128	high	0	0
932	13128	intermediate	0	0
933	13128	low	0	0
934	13129	high	0	0
935	13129	intermediate	0.0189393939393939	300.48707
936	13129	low	0.372434017595308	50680.4847496063
937	13131	high	0	0
938	13131	intermediate	0	0
939	13131	low	0	0
940	13132	high	0.00213219616204691	109.1776
941	13132	intermediate	0.00575815738963532	107.025766666667
942	13132	low	0.00666666666666667	102.974266666667
943	13133	high	0.00460829493087558	102.62285
944	13133	intermediate	0.00191938579654511	110.5362
945	13133	low	0.00824742268041237	106.786725
946	13134	high	0	0
947	13134	intermediate	0	0
948	13134	low	0	0
949	13135	high	0	0
950	13135	intermediate	0.00204918032786885	107.5592
951	13135	low	0.00808080808080808	107.99105
952	13136	high	0	0
953	13136	intermediate	0	0
954	13136	low	0	0
955	13137	high	0	0
956	13137	intermediate	0	0
957	13137	low	0	0
958	13138	high	0	0
959	13138	intermediate	0	0
960	13138	low	0	0
961	13139	high	0	0
962	13139	intermediate	0	0
963	13139	low	0	0
964	13140	high	0	0
965	13140	intermediate	0	0
966	13140	low	0	0
967	13150	high	0	0
968	13150	intermediate	0	0
969	13150	low	0	0
970	13160	high	0	0
971	13160	intermediate	0	0
972	13160	low	0	0
973	13170	high	0	0
974	13170	intermediate	0	0
975	13170	low	0	0
976	13181	high	0	0
977	13181	intermediate	0.0157728706624606	231.70722
978	13181	low	0	0
979	13182	high	0	0
980	13182	intermediate	0	0
981	13182	low	0	0
982	13183	high	0	0
983	13183	intermediate	0.0152905198776758	238.01832
984	13183	low	0	0
985	13184	high	0	0
986	13184	intermediate	0	0
987	13184	low	0	0
988	13185	high	0	0
989	13185	intermediate	0	0
990	13185	low	0	0
991	13186	high	0	0
992	13186	intermediate	0	0
993	13186	low	0	0
994	13187	high	0	0
995	13187	intermediate	0	0
996	13187	low	0	0
997	13188	high	0	0
998	13188	intermediate	0	0
999	13188	low	0	0
1000	13189	high	0	0
1001	13189	intermediate	0	0
1002	13189	low	0	0
1003	13190	high	0	0
1004	13190	intermediate	0	0
1005	13190	low	0	0
1006	13211	high	0	0
1007	13211	intermediate	0	0
1008	13211	low	0	0
1009	13212	high	0	0
1010	13212	intermediate	0	0
1011	13212	low	0	0
1012	13213	high	0	0
1013	13213	intermediate	0	0
1014	13213	low	0	0
1015	13214	high	0	0
1016	13214	intermediate	0	0
1017	13214	low	0	0
1018	13215	high	0	0
1019	13215	intermediate	0	0
1020	13215	low	0	0
1021	13216	high	0	0
1022	13216	intermediate	0	0
1023	13216	low	0	0
1024	13217	high	0	0
1025	13217	intermediate	0	0
1026	13217	low	0	0
1027	13218	high	0	0
1028	13218	intermediate	0	0
1029	13218	low	0	0
1030	13219	high	0	0
1031	13219	intermediate	0	0
1032	13219	low	0	0
1033	13221	high	0	0
1034	13221	intermediate	0	0
1035	13221	low	0	0
1036	13222	high	0	0
1037	13222	intermediate	0	0
1038	13222	low	0	0
1039	13223	high	0	0
1040	13223	intermediate	0	0
1041	13223	low	0	0
1042	13224	high	0	0
1043	13224	intermediate	0	0
1044	13224	low	0	0
1045	13225	high	0	0
1046	13225	intermediate	0	0
1047	13225	low	0	0
1048	13226	high	0	0
1049	13226	intermediate	0	0
1050	13226	low	0	0
1051	13227	high	0	0
1052	13227	intermediate	0	0
1053	13227	low	0	0
1054	13228	high	0	0
1055	13228	intermediate	0	0
1056	13228	low	0	0
1057	13229	high	0	0
1058	13229	intermediate	0	0
1059	13229	low	0	0
1060	13230	high	0	0
1061	13230	intermediate	0	0
1062	13230	low	NA	NA
1063	13241	high	0	0
1064	13241	intermediate	0	0
1065	13241	low	NA	NA
1066	13242	high	0	0
1067	13242	intermediate	0	0
1068	13242	low	0	0
1069	13244	high	0	0
1070	13244	intermediate	0	0
1071	13244	low	0	0
1072	13245	high	0	0
1073	13245	intermediate	0	0
1074	13245	low	0	0
1075	13246	high	0	0
1076	13246	intermediate	0	0
1077	13246	low	0	0
1078	13247	high	0	0
1079	13247	intermediate	0	0
1080	13247	low	0	0
1081	13248	high	0	0
1082	13248	intermediate	0	0
1083	13248	low	0	0
1084	13249	high	0	0
1085	13249	intermediate	0	0
1086	13249	low	0	0
1087	13250	high	0	0
1088	13250	intermediate	0	0
1089	13250	low	NA	NA
1090	13261	high	0	0
1091	13261	intermediate	0	0
1092	13261	low	0	0
1093	13262	high	0	0
1094	13262	intermediate	0	0
1095	13262	low	0	0
1096	13263	high	0	0
1097	13263	intermediate	0	0
1098	13263	low	0	0
1099	13264	high	0	0
1100	13264	intermediate	0	0
1101	13264	low	0	0
1102	13265	high	0	0
1103	13265	intermediate	0	0
1104	13265	low	0	0
1105	13266	high	0	0
1106	13266	intermediate	0	0
1107	13266	low	0	0
1108	13267	high	0	0
1109	13267	intermediate	0	0
1110	13267	low	0	0
1111	13268	high	0	0
1112	13268	intermediate	0	0
1113	13268	low	0	0
1114	13269	high	0	0
1115	13269	intermediate	0	0
1116	13269	low	0	0
1117	13272	high	0	0
1118	13272	intermediate	0	0
1119	13272	low	0	0
1120	13273	high	0	0
1121	13273	intermediate	0	0
1122	13273	low	0	0
1123	13274	high	0	0
1124	13274	intermediate	0	0
1125	13274	low	0	0
1126	13275	high	0	0
1127	13275	intermediate	0	0
1128	13275	low	0	0
1129	13276	high	0	0
1130	13276	intermediate	0	0
1131	13276	low	0	0
1132	13277	high	0	0
1133	13277	intermediate	0	0
1134	13277	low	0	0
1135	13278	high	0	0
1136	13278	intermediate	0	0
1137	13278	low	0	0
1138	13279	high	0	0
1139	13279	intermediate	0	0
1140	13279	low	0	0
1141	13281	high	0.00303951367781155	100.88225
1142	13281	intermediate	0.012	124.697333333333
1143	13281	low	0.0056390977443609	137.466833333333
1144	13282	high	0	0
1145	13282	intermediate	0	0
1146	13282	low	0	0
1147	13283	high	0.00157728706624606	101.6239
1148	13283	intermediate	0.0109090909090909	131.881666666667
1149	13283	low	0.00564971751412429	239.6525
1150	13284	high	0.00179533213644524	112.7381
1151	13284	intermediate	0.00967117988394584	101.32992
1152	13284	low	0	0
1153	13285	high	0	0
1154	13285	intermediate	0	0
1155	13285	low	0	0
1156	13286	high	0	0
1157	13286	intermediate	0	0
1158	13286	low	0.00946372239747634	114.7396
1159	13287	high	0.00154320987654321	123.1001
1160	13287	intermediate	0	0
1161	13287	low	0.00606060606060606	156.80565
1162	13288	high	0.00155038759689922	146.7821
1163	13288	intermediate	0	0
1164	13288	low	0.0069204152249135	190.82575
1165	13289	high	0.0015625	128.778
1166	13289	intermediate	0	0
1167	13289	low	0.00591715976331361	157.06135
1168	13291	high	0	0
1169	13291	intermediate	0.00257731958762887	105.104
1170	13291	low	0.0045045045045045	111.18675
1171	13292	high	0	0
1172	13292	intermediate	0	0
1173	13292	low	0	0
1174	13293	high	0	0
1175	13293	intermediate	0.0051150895140665	103.31465
1176	13293	low	0.00217391304347826	102.2825
1177	13294	high	0	0
1178	13294	intermediate	0.110831234256927	117.281156818182
1179	13294	low	0.10239651416122	147.718604255319
1180	13295	high	0	0
1181	13295	intermediate	0.00505050505050505	103.7376
1182	13295	low	0.00212314225053079	101.5849
1183	13296	high	0.00167785234899329	103.364
1184	13296	intermediate	0.00280898876404494	112.7335
1185	13296	low	0.00204918032786885	100.1579
1186	13297	high	0	0
1187	13297	intermediate	0	0
1188	13297	low	0.0055452865064695	104.039766666667
1189	13298	high	0	0
1190	13298	intermediate	0	0
1191	13298	low	0	0
1192	13299	high	0	0
1193	13299	intermediate	0	0
1194	13299	low	0	0
1195	13310	high	0	0
1196	13310	intermediate	0	0
1197	13310	low	0	0
1198	13320	high	0	0
1199	13320	intermediate	0	0
1200	13320	low	0	0
1201	13330	high	0	0
1202	13330	intermediate	0	0
1203	13330	low	0	0
1204	13341	high	0	0
1205	13341	intermediate	0	0
1206	13341	low	0	0
1207	13342	high	0	0
1208	13342	intermediate	0	0
1209	13342	low	0	0
1210	13343	high	0	0
1211	13343	intermediate	0	0
1212	13343	low	0	0
1213	13344	high	0	0
1214	13344	intermediate	0	0
1215	13344	low	0	0
1216	13345	high	0	0
1217	13345	intermediate	0	0
1218	13345	low	0	0
1219	13346	high	0	0
1220	13346	intermediate	0	0
1221	13346	low	0	0
1222	13347	high	0	0
1223	13347	intermediate	0	0
1224	13347	low	0	0
1225	13348	high	0	0
1226	13348	intermediate	0	0
1227	13348	low	0	0
1228	13349	high	0	0
1229	13349	intermediate	0	0
1230	13349	low	0	0
1231	13351	high	0	0
1232	13351	intermediate	0	0
1233	13351	low	0	0
1234	13352	high	0	0
1235	13352	intermediate	0	0
1236	13352	low	0	0
1237	13353	high	0	0
1238	13353	intermediate	0	0
1239	13353	low	0	0
1240	13354	high	0	0
1241	13354	intermediate	0	0
1242	13354	low	0	0
1243	13355	high	0	0
1244	13355	intermediate	0	0
1245	13355	low	0	0
1246	13356	high	0	0
1247	13356	intermediate	0	0
1248	13356	low	0	0
1249	13357	high	0	0
1250	13357	intermediate	0	0
1251	13357	low	0	0
1252	13358	high	0	0
1253	13358	intermediate	0	0
1254	13358	low	0	0
1255	13361	high	0	0
1256	13361	intermediate	0	0
1257	13361	low	0	0
1258	13362	high	0	0
1259	13362	intermediate	0	0
1260	13362	low	0.0420168067226891	149.706366666667
1261	13363	high	0	0
1262	13363	intermediate	0.00950570342205323	112.56596
1263	13363	low	0.00591715976331361	102.3449
1264	13364	high	0	0
1265	13364	intermediate	0	0
1266	13364	low	0	0
1267	13365	high	0.0381818181818182	120.26580952381
1268	13365	intermediate	0.116788321167883	160.1737359375
1269	13365	low	0.228070175438596	200.277465384615
1270	13366	high	0	0
1271	13366	intermediate	0	0
1272	13366	low	0	0
1273	13368	high	0	0
1274	13368	intermediate	0	0
1275	13368	low	0	0
1276	13369	high	0	0
1277	13369	intermediate	0	0
1278	13369	low	0	0
1279	13370	high	0	0
1280	13370	intermediate	0	0
1281	13370	low	0	0
1282	13380	high	0	0
1283	13380	intermediate	0	0
1284	13380	low	0	0
1285	13390	high	0	0
1286	13390	intermediate	0	0
1287	13390	low	0	0
1288	13400	high	0	0
1289	13400	intermediate	0	0
1290	13400	low	0	0
1291	14100	high	0	0
1292	14100	intermediate	0	0
1293	14100	low	0.208571428571429	198.368767123288
1294	14210	high	0	0
1295	14210	intermediate	0	0
1296	14210	low	0.219941348973607	196.080237333333
1297	14221	high	0	0
1298	14221	intermediate	0.0604166666666667	112.196606896552
1299	14221	low	0.252336448598131	288.87837037037
1300	14222	high	0	0
1301	14222	intermediate	0	0
1302	14222	low	0	0
1303	14223	high	0	0
1304	14223	intermediate	0.0793650793650794	113.6759475
1305	14223	low	0.26303317535545	327.347837837838
1306	14224	high	0	0
1307	14224	intermediate	0	0
1308	14224	low	0	0
1309	14225	high	0	0
1310	14225	intermediate	0.188916876574307	127.677758666667
1311	14225	low	0.200331125827815	3066.67915702479
1312	14226	high	0	0
1313	14226	intermediate	0	0
1314	14226	low	0	0
1315	14227	high	0	0
1316	14227	intermediate	0.141791044776119	129.758585526316
1317	14227	low	0.292857142857143	2314.57760325203
1318	14228	high	0	0
1319	14228	intermediate	0.191287878787879	167.09225049505
1320	14228	low	0.30166270783848	4403.22790393701
1321	14229	high	0	0
1322	14229	intermediate	0.24869109947644	168.340994736842
1323	14229	low	0.200980392156863	4671.43456178862
1324	14232	high	0.0093984962406015	104.39442
1325	14232	intermediate	0.00505902192242833	120.3332
1326	14232	low	0.228571428571429	327.526602777778
1327	14233	high	0.00950570342205323	105.0645
1328	14233	intermediate	0.0050251256281407	119.413366666667
1329	14233	low	0.227129337539432	324.599283333333
1330	14234	high	0.0742971887550201	166.123464864865
1331	14234	intermediate	0.287414965986395	1679.21852189349
1332	14234	low	0.172316384180791	5483.97225901639
1333	14235	high	0.0115384615384615	104.9793
1334	14235	intermediate	0.005	120.111166666667
1335	14235	low	0.228125	370.059995890411
1336	14236	high	0	0
1337	14236	intermediate	0	0
1338	14236	low	0	0
1339	14237	high	0	0
1340	14237	intermediate	0	0
1341	14237	low	0.0828220858895705	358.149714814815
1342	14238	high	0	0
1343	14238	intermediate	0	0
1344	14238	low	0	0
1345	14239	high	0	0
1346	14239	intermediate	0	0
1347	14239	low	0	0
1348	14241	high	0	0
1349	14241	intermediate	0	0
1350	14241	low	0.251111111111111	527.62634159292
1351	14242	high	0	0
1352	14242	intermediate	0	0
1353	14242	low	0.338235294117647	636.362529710145
1354	14243	high	0	0
1355	14243	intermediate	0	0
1356	14243	low	0.296218487394958	598.700475177305
1357	14244	high	0	0
1358	14244	intermediate	0	0
1359	14244	low	0.236541598694943	1900.31463586207
1360	14245	high	0	0
1361	14245	intermediate	0	0
1362	14245	low	0.244444444444444	759.400333566434
1363	14246	high	0.00480769230769231	123.5536
1364	14246	intermediate	0.276255707762557	2242.93056528926
1365	14246	low	0.0699658703071672	1127.68788536585
1366	14248	high	0	0
1367	14248	intermediate	0.0099009900990099	113.57126
1368	14248	low	0.257495590828924	1996.67208150685
1369	14249	high	0	0
1370	14249	intermediate	0	0
1371	14249	low	0.323725055432373	1929.79990273973
1372	14252	high	0	0
1373	14252	intermediate	0	0
1374	14252	low	0	0
1375	14253	high	0	0
1376	14253	intermediate	0	0
1377	14253	low	0	0
1378	14254	high	0	0
1379	14254	intermediate	0	0
1380	14254	low	0	0
1381	14256	high	0	0
1382	14256	intermediate	0	0
1383	14256	low	0	0
1384	14258	high	0	0
1385	14258	intermediate	0	0
1386	14258	low	0	0
1387	14259	high	0	0
1388	14259	intermediate	0	0
1389	14259	low	0	0
1390	14261	high	0	0
1391	14261	intermediate	0	0
1392	14261	low	0	0
1393	14262	high	0	0
1394	14262	intermediate	0	0
1395	14262	low	0	0
1396	14263	high	0	0
1397	14263	intermediate	0	0
1398	14263	low	0	0
1399	14264	high	0	0
1400	14264	intermediate	0	0
1401	14264	low	0	0
1402	14265	high	0	0
1403	14265	intermediate	0	0
1404	14265	low	0	0
1405	14266	high	0	0
1406	14266	intermediate	0	0
1407	14266	low	0	0
1408	14268	high	0	0
1409	14268	intermediate	0	0
1410	14268	low	0	0
1411	14269	high	0	0
1412	14269	intermediate	0	0
1413	14269	low	0	0
1414	14271	high	0	0
1415	14271	intermediate	0	0
1416	14271	low	0	0
1417	14272	high	0	0
1418	14272	intermediate	0.00179533213644524	103.5387
1419	14272	low	0.00972762645914397	146.06894
1420	14273	high	0	0
1421	14273	intermediate	0	0
1422	14273	low	0	0
1423	14274	high	0	0
1424	14274	intermediate	0	0
1425	14274	low	0	0
1426	14275	high	0	0
1427	14275	intermediate	0	0
1428	14275	low	0	0
1429	14276	high	0	0
1430	14276	intermediate	0	0
1431	14276	low	0	0
1432	14277	high	0	0
1433	14277	intermediate	0	0
1434	14277	low	0	0
1435	14278	high	0	0
1436	14278	intermediate	0	0
1437	14278	low	0	0
1438	14279	high	0	0
1439	14279	intermediate	0	0
1440	14279	low	0	0
1441	14281	high	0	0
1442	14281	intermediate	0	0
1443	14281	low	0	0
1444	14282	high	0	0
1445	14282	intermediate	0	0
1446	14282	low	0	0
1447	14283	high	0	0
1448	14283	intermediate	0	0
1449	14283	low	0	0
1450	14284	high	0	0
1451	14284	intermediate	0	0
1452	14284	low	0.178353658536585	9298.79958461538
1453	14285	high	0	0
1454	14285	intermediate	0	0
1455	14285	low	0	0
1456	14286	high	0	0
1457	14286	intermediate	0	0
1458	14286	low	0	0
1459	14288	high	0	0
1460	14288	intermediate	0	0
1461	14288	low	0	0
1462	14289	high	0	0
1463	14289	intermediate	0	0
1464	14289	low	0	0
1465	14292	high	0	0
1466	14292	intermediate	0	0
1467	14292	low	0	0
1468	14293	high	0	0
1469	14293	intermediate	0	0
1470	14293	low	0	0
1471	14294	high	0	0
1472	14294	intermediate	0	0
1473	14294	low	0	0
1474	14295	high	0	0
1475	14295	intermediate	0	0
1476	14295	low	0	0
1477	14296	high	0	0
1478	14296	intermediate	0	0
1479	14296	low	0.00190114068441065	112.2892
1480	14297	high	0	0
1481	14297	intermediate	0	0
1482	14297	low	0	0
1483	14298	high	0	0
1484	14298	intermediate	0	0
1485	14298	low	0	0
1486	14299	high	0	0
1487	14299	intermediate	0	0
1488	14299	low	0	0
1489	14301	high	0	0
1490	14301	intermediate	0	0
1491	14301	low	0.165254237288136	205.442852564103
1492	14302	high	0	0
1493	14302	intermediate	0	0
1494	14302	low	0	0
1495	14303	high	0	0
1496	14303	intermediate	0	0
1497	14303	low	0	0
1498	14304	high	0	0
1499	14304	intermediate	0	0
1500	14304	low	0	0
1501	14306	high	0	0
1502	14306	intermediate	0	0
1503	14306	low	0	0
1504	14307	high	0	0
1505	14307	intermediate	0	0
1506	14307	low	0	0
1507	14308	high	0.105263157894737	169.468188235294
1508	14308	intermediate	0.159919028340081	169.562124050633
1509	14308	low	0.0633333333333333	232.394721052632
1510	14309	high	0	0
1511	14309	intermediate	0	0
1512	14309	low	0	0
1513	14410	high	0.142857142857143	225.409545783133
1514	14410	intermediate	0.312039312039312	687.493311023622
1515	14410	low	0	0
1516	14420	high	0	0
1517	14420	intermediate	0	0
1518	14420	low	0.00289855072463768	168.8213
1519	14430	high	0	0
1520	14430	intermediate	0	0
1521	14430	low	0.00294117647058824	128.9621
1522	14441	high	0	0
1523	14441	intermediate	0	0
1524	14441	low	0.0650684931506849	793.183147368421
1525	14442	high	0	0
1526	14442	intermediate	0	0
1527	14442	low	0	0
1528	14443	high	0	0
1529	14443	intermediate	0	0
1530	14443	low	0.0704918032786885	860.543690697674
1531	14444	high	0	0
1532	14444	intermediate	0.00561797752808989	103.59425
1533	14444	low	0.084045584045584	679.268281355932
1534	14446	high	0	0
1535	14446	intermediate	0	0
1536	14446	low	0	0
1537	14447	high	0.0077319587628866	116.750633333333
1538	14447	intermediate	0.0650759219088937	118.20933
1539	14447	low	0.104906937394247	1537.28073387097
1540	14448	high	0	0
1541	14448	intermediate	0	0
1542	14448	low	0	0
1543	14449	high	0.0399002493765586	140.94234375
1544	14449	intermediate	0.143636363636364	1096.42808607595
1545	14449	low	0.0613496932515337	1721.97902333333
1546	14450	high	0	0
1547	14450	intermediate	0	0
1548	14450	low	0.0027027027027027	201.3883
1549	14460	high	0	0
1550	14460	intermediate	0	0
1551	14460	low	0	0
1552	14470	high	0	0
1553	14470	intermediate	0	0
1554	14470	low	0	0
1555	14480	high	0	0
1556	14480	intermediate	0	0
1557	14480	low	0	0
1558	14490	high	0	0
1559	14490	intermediate	0	0
1560	14490	low	0	0
1561	14510	high	0	0
1562	14510	intermediate	0	0
1563	14510	low	0	0
1564	14520	high	0	0
1565	14520	intermediate	0	0
1566	14520	low	0	0
1567	14530	high	0	0
1568	14530	intermediate	0.014903129657228	102.29297
1569	14530	low	0.0476190476190476	221.6619
1570	14540	high	0	0
1571	14540	intermediate	0.0150478796169631	108.935772727273
1572	14540	low	0.0425531914893617	260.1411
1573	14550	high	0	0
1574	14550	intermediate	0	0
1575	14550	low	0	0
1576	14560	high	0.0215384615384615	161.71005
1577	14560	intermediate	0.101744186046512	149.467272857143
1578	14560	low	0.00980392156862745	368.592
1579	14571	high	0	0
1580	14571	intermediate	0	0
1581	14571	low	0	0
1582	14572	high	0	0
1583	14572	intermediate	0	0
1584	14572	low	0	0
1585	14573	high	0	0
1586	14573	intermediate	0	0
1587	14573	low	0	0
1588	14574	high	0	0
1589	14574	intermediate	0	0
1590	14574	low	0	0
1591	14575	high	0	0
1592	14575	intermediate	0	0
1593	14575	low	0	0
1594	14576	high	0	0
1595	14576	intermediate	0	0
1596	14576	low	0	0
1597	14577	high	0	0
1598	14577	intermediate	0	0
1599	14577	low	0.0228310502283105	1581.90441333333
1600	14578	high	0	0
1601	14578	intermediate	0	0
1602	14578	low	0	0
1603	14579	high	0	0
1604	14579	intermediate	0	0
1605	14579	low	0	0
1606	14580	high	0	0
1607	14580	intermediate	0	0
1608	14580	low	0	0
1609	14590	high	0	0
1610	14590	intermediate	0	0
1611	14590	low	0	0
1612	14610	high	0	0
1613	14610	intermediate	0.0840197693574959	129.5547
1614	14610	low	0.0336391437308868	148.420290909091
1615	14620	high	0	0
1616	14620	intermediate	0.0940819423368741	130.051616129032
1617	14620	low	0.279503105590062	3872.47130888889
1618	14630	high	0	0
1619	14630	intermediate	0	0
1620	14630	low	0	0
1621	14631	high	0	0
1622	14631	intermediate	0.0923994038748137	133.990729032258
1623	14631	low	0.337620578778135	10928.5350171429
1624	14632	high	0	0
1625	14632	intermediate	0.0943396226415094	134.256889230769
1626	14632	low	0.272435897435897	16714.9004270588
1627	14633	high	0	0
1628	14633	intermediate	0.0998509687034277	134.341944776119
1629	14633	low	0.400621118012422	14074.5091302326
1630	14634	high	0.0141643059490085	1029.63844
1631	14634	intermediate	0.0486111111111111	766.881117142857
1632	14634	low	0.0190735694822888	592.756314285714
1633	14635	high	0	0
1634	14635	intermediate	0.0980683506686478	136.314483333333
1635	14635	low	0.245614035087719	9077.46573333333
1636	14636	high	0	0
1637	14636	intermediate	0.161572052401747	134.561151351351
1638	14636	low	0.145695364238411	4886.38463863636
1639	14637	high	0	0
1640	14637	intermediate	0.124444444444444	132.294586904762
1641	14637	low	0.245664739884393	5107.06912705882
1642	14638	high	0	0
1643	14638	intermediate	0.14064914992272	136.124251648352
1644	14638	low	0.237704918032787	6092.97497011494
1645	14640	high	0	0
1646	14640	intermediate	0.21021897810219	1560.34866041667
1647	14640	low	0.208588957055215	12474.9679161765
1648	14650	high	0	0
1649	14650	intermediate	0	0
1650	14650	low	0.00651041666666667	169.07352
1651	14661	high	0	0
1652	14661	intermediate	0.221438645980254	1392.80801783439
1653	14661	low	0.2125	11831.4036382353
1654	14662	high	0	0
1655	14662	intermediate	0	0
1656	14662	low	0	0
1657	14663	high	0	0
1658	14663	intermediate	0	0
1659	14663	low	0	0
1660	14664	high	0	0
1661	14664	intermediate	0	0
1662	14664	low	0	0
1663	14665	high	0	0
1664	14665	intermediate	0	0
1665	14665	low	0	0
1666	14666	high	0	0
1667	14666	intermediate	0	0
1668	14666	low	0	0
1669	14667	high	0	0
1670	14667	intermediate	0	0
1671	14667	low	0	0
1672	14668	high	0	0
1673	14668	intermediate	0	0
1674	14668	low	0	0
1675	14669	high	0	0
1676	14669	intermediate	0	0
1677	14669	low	0	0
1678	14670	high	0	0
1679	14670	intermediate	0.28755364806867	2588.63969701493
1680	14670	low	0.156351791530945	10339.8638770833
1681	14680	high	0.0523138832997988	1201.0406
1682	14680	intermediate	0.362339514978602	2252.46298582677
1683	14680	low	0	0
1684	14691	high	0	0
1685	14691	intermediate	0.297142857142857	1440.50736634615
1686	14691	low	0.16887417218543	5361.49238627451
1687	14692	high	0	0
1688	14692	intermediate	0	0
1689	14692	low	0	0
1690	14693	high	0	0
1691	14693	intermediate	0	0
1692	14693	low	0	0
1693	14694	high	0	0
1694	14694	intermediate	0	0
1695	14694	low	0	0
1696	14695	high	0	0
1697	14695	intermediate	0	0
1698	14695	low	0	0
1699	14696	high	0	0
1700	14696	intermediate	0	0
1701	14696	low	0	0
1702	14697	high	0.00785340314136126	107.364933333333
1703	14697	intermediate	0	0
1704	14697	low	0	0
1705	14698	high	0	0
1706	14698	intermediate	0	0
1707	14698	low	0	0
1708	14699	high	0	0
1709	14699	intermediate	0	0
1710	14699	low	0	0
1711	15110	high	0	0
1712	15110	intermediate	0	0
1713	15110	low	0	0
1714	15112	high	0	0
1715	15112	intermediate	0.110367892976589	133.462201515152
1716	15112	low	0.283387622149837	6588.95063793103
1717	15113	high	0	0
1718	15113	intermediate	0	0
1719	15113	low	0	0
1720	15114	high	0	0
1721	15114	intermediate	0	0
1722	15114	low	0	0
1723	15115	high	0	0
1724	15115	intermediate	0	0
1725	15115	low	0	0
1726	15116	high	0	0
1727	15116	intermediate	0	0
1728	15116	low	0	0
1729	15117	high	0	0
1730	15117	intermediate	0	0
1731	15117	low	0	0
1732	15118	high	0	0
1733	15118	intermediate	0	0
1734	15118	low	0	0
1735	15119	high	0	0
1736	15119	intermediate	0	0
1737	15119	low	0	0
1738	15120	high	0	0
1739	15120	intermediate	0	0
1740	15120	low	0	0
1741	15121	high	0	0
1742	15121	intermediate	0	0
1743	15121	low	0	0
1744	15122	high	0	0
1745	15122	intermediate	0	0
1746	15122	low	0	0
1747	15124	high	0	0
1748	15124	intermediate	0	0
1749	15124	low	0	0
1750	15125	high	0	0
1751	15125	intermediate	0	0
1752	15125	low	0	0
1753	15126	high	0	0
1754	15126	intermediate	0	0
1755	15126	low	0	0
1756	15127	high	0	0
1757	15127	intermediate	0	0
1758	15127	low	0	0
1759	15129	high	0	0
1760	15129	intermediate	0	0
1761	15129	low	0	0
1762	15130	high	0	0
1763	15130	intermediate	0	0
1764	15130	low	0	0
1765	15140	high	0.0204778156996587	131.540958333333
1766	15140	intermediate	0.0156521739130435	126.991155555556
1767	15140	low	0	0
1768	15150	high	0	0
1769	15150	intermediate	0	0
1770	15150	low	0	0
1771	15160	high	0.00321543408360129	120.4242
1772	15160	intermediate	0.00198412698412698	103.9308
1773	15160	low	0	0
1774	15170	high	0.00346620450606586	121.652
1775	15170	intermediate	0.0244360902255639	128.864292307692
1776	15170	low	0	0
1777	15180	high	0	0
1778	15180	intermediate	0	0
1779	15180	low	0	0
1780	15190	high	0	0
1781	15190	intermediate	0	0
1782	15190	low	0	0
1783	15200	high	0	0
1784	15200	intermediate	0	0
1785	15200	low	0	0
1786	15301	high	0	0
1787	15301	intermediate	0	0
1788	15301	low	0	0
1789	15302	high	0	0
1790	15302	intermediate	0	0
1791	15302	low	0	0
1792	15303	high	0	0
1793	15303	intermediate	0	0
1794	15303	low	0	0
1795	15304	high	0	0
1796	15304	intermediate	0	0
1797	15304	low	0	0
1798	15305	high	0	0
1799	15305	intermediate	0	0
1800	15305	low	0	0
1801	15306	high	0	0
1802	15306	intermediate	0	0
1803	15306	low	0	0
1804	15307	high	0	0
1805	15307	intermediate	0	0
1806	15307	low	0	0
1807	15308	high	0	0
1808	15308	intermediate	0	0
1809	15308	low	0	0
1810	15309	high	0	0
1811	15309	intermediate	0	0
1812	15309	low	0	0
1813	15410	high	0	0
1814	15410	intermediate	0	0
1815	15410	low	0	0
1816	15421	high	0	0
1817	15421	intermediate	0	0
1818	15421	low	0	0
1819	15422	high	0	0
1820	15422	intermediate	0	0
1821	15422	low	0	0
1822	15423	high	0	0
1823	15423	intermediate	0	0
1824	15423	low	0	0
1825	15424	high	0	0
1826	15424	intermediate	0	0
1827	15424	low	0	0
1828	15425	high	0	0
1829	15425	intermediate	0	0
1830	15425	low	0	0
1831	15426	high	0	0
1832	15426	intermediate	0	0
1833	15426	low	0	0
1834	15430	high	0	0
1835	15430	intermediate	0	0
1836	15430	low	0	0
1837	15440	high	0	0
1838	15440	intermediate	0	0
1839	15440	low	0	0
1840	15451	high	0	0
1841	15451	intermediate	0	0
1842	15451	low	0	0
1843	15452	high	0	0
1844	15452	intermediate	0	0
1845	15452	low	0	0
1846	15453	high	0	0
1847	15453	intermediate	0	0
1848	15453	low	0	0
1849	15460	high	0	0
1850	15460	intermediate	0	0
1851	15460	low	0	0
1852	15471	high	0	0
1853	15471	intermediate	0	0
1854	15471	low	0	0
1855	15472	high	0	0
1856	15472	intermediate	0	0
1857	15472	low	0	0
1858	15473	high	0	0
1859	15473	intermediate	0	0
1860	15473	low	0	0
1861	15474	high	0	0
1862	15474	intermediate	0	0
1863	15474	low	0	0
1864	15475	high	0	0
1865	15475	intermediate	0	0
1866	15475	low	0	0
1867	15476	high	0	0
1868	15476	intermediate	0	0
1869	15476	low	0	0
1870	15477	high	0	0
1871	15477	intermediate	0	0
1872	15477	low	0	0
1873	15478	high	0	0
1874	15478	intermediate	0	0
1875	15478	low	0	0
1876	15479	high	0	0
1877	15479	intermediate	0	0
1878	15479	low	0	0
1879	15481	high	0	0
1880	15481	intermediate	0	0
1881	15481	low	0	0
1882	15482	high	0	0
1883	15482	intermediate	0	0
1884	15482	low	0	0
1885	15485	high	0	0
1886	15485	intermediate	0	0
1887	15485	low	0	0
1888	15490	high	0	0
1889	15490	intermediate	0	0
1890	15490	low	0	0
1891	15511	high	0	0
1892	15511	intermediate	0	0
1893	15511	low	0	0
1894	15512	high	0	0
1895	15512	intermediate	0	0
1896	15512	low	0	0
1897	15513	high	0	0
1898	15513	intermediate	0	0
1899	15513	low	0	0
1900	15514	high	0	0
1901	15514	intermediate	0	0
1902	15514	low	0	0
1903	15515	high	0	0
1904	15515	intermediate	0	0
1905	15515	low	0	0
1906	15516	high	0	0
1907	15516	intermediate	0	0
1908	15516	low	0	0
1909	15517	high	0	0
1910	15517	intermediate	0	0
1911	15517	low	0	0
1912	15521	high	0	0
1913	15521	intermediate	0	0
1914	15521	low	0	0
1915	15522	high	0	0
1916	15522	intermediate	0	0
1917	15522	low	0	0
1918	15523	high	0	0
1919	15523	intermediate	0	0
1920	15523	low	0	0
1921	15524	high	0	0
1922	15524	intermediate	0	0
1923	15524	low	0	0
1924	15525	high	0	0
1925	15525	intermediate	0	0
1926	15525	low	0	0
1927	15526	high	0	0
1928	15526	intermediate	0	0
1929	15526	low	0	0
1930	15527	high	0	0
1931	15527	intermediate	0	0
1932	15527	low	0	0
1933	15528	high	0	0
1934	15528	intermediate	0	0
1935	15528	low	0	0
1936	15529	high	0	0
1937	15529	intermediate	0	0
1938	15529	low	0	0
1939	15531	high	0	0
1940	15531	intermediate	0	0
1941	15531	low	0	0
1942	15532	high	0.00581395348837209	207.344833333333
1943	15532	intermediate	0	0
1944	15532	low	0	0
1945	15533	high	0.00626304801670146	218.499366666667
1946	15533	intermediate	0	0
1947	15533	low	0	0
1948	15534	high	0.00425531914893617	278.6756
1949	15534	intermediate	0.00174825174825175	109.0787
1950	15534	low	0	0
1951	15535	high	0	0
1952	15535	intermediate	0	0
1953	15535	low	0	0
1954	15536	high	0	0
1955	15536	intermediate	0	0
1956	15536	low	0	0
1957	15537	high	0.00849256900212314	152.366475
1958	15537	intermediate	0.00194552529182879	146.6425
1959	15537	low	0	0
1960	15538	high	0	0
1961	15538	intermediate	0	0
1962	15538	low	0	0
1963	15539	high	0	0
1964	15539	intermediate	0	0
1965	15539	low	0	0
1966	15541	high	0	0
1967	15541	intermediate	0	0
1968	15541	low	0	0
1969	15542	high	0	0
1970	15542	intermediate	0	0
1971	15542	low	0	0
1972	15543	high	0	0
1973	15543	intermediate	0	0
1974	15543	low	0	0
1975	15544	high	0	0
1976	15544	intermediate	0	0
1977	15544	low	0	0
1978	15545	high	0	0
1979	15545	intermediate	0	0
1980	15545	low	0	0
1981	15546	high	0	0
1982	15546	intermediate	0	0
1983	15546	low	0	0
1984	15547	high	0	0
1985	15547	intermediate	0	0
1986	15547	low	0	0
1987	15548	high	0.00604838709677419	125.748633333333
1988	15548	intermediate	0	0
1989	15548	low	0	0
1990	15551	high	0.00448430493273543	123.21215
1991	15551	intermediate	0.00178571428571429	108.4221
1992	15551	low	0	0
1993	15552	high	0	0
1994	15552	intermediate	0	0
1995	15552	low	0	0
1996	15553	high	0	0
1997	15553	intermediate	0	0
1998	15553	low	0	0
1999	15554	high	0	0
[truncated: 11,147 more rows]
